# Supplementary material
Source: ML conference proceedings conference paper supplement (https://openreview.net/forum?id=TNZse5q2Tr)
Supplement: supplementary_material [file chess-study-neurips-2025.pdf › supplementary/chess-study-neurips-2025.pdf]

[illegible]

























[illegible]









[illegible]





| Please rate the following position for difficulty, creativity and counter intuitiveness.                                                                                                                                                                                                                                                                                        |       |              |           |           |          |     |                   |                                                                                                                                                                                                                                                                                                                                                                                                                                       |        | Additional information about the position:<br>The closest board, and the corresponding FEN, are the "nearest" board in the training data. This is given here as a reference to how much it modified the position.<br>The principal variation presents the SF solution. |               |                                                            |                                                                                                                                                                                                                                                                    |                     |               |  |  |  |  |
|---------------------------------------------------------------------------------------------------------------------------------------------------------------------------------------------------------------------------------------------------------------------------------------------------------------------------------------------------------------------------------|-------|--------------|-----------|-----------|----------|-----|-------------------|---------------------------------------------------------------------------------------------------------------------------------------------------------------------------------------------------------------------------------------------------------------------------------------------------------------------------------------------------------------------------------------------------------------------------------------|--------|------------------------------------------------------------------------------------------------------------------------------------------------------------------------------------------------------------------------------------------------------------------------|---------------|------------------------------------------------------------|--------------------------------------------------------------------------------------------------------------------------------------------------------------------------------------------------------------------------------------------------------------------|---------------------|---------------|--|--|--|--|
| Please use the following scoring scheme:<br>3 = Chess expert (2000+)<br>2 = chess amateur (1200-2000)<br>1 = chess beginner (<1200)<br>0 = trivial/unrated puzzle<br>For example, rate the puzzle with 3 if you think a chess expert will find the puzzle difficult/creative/counterintuitive.<br>When multiple ratings could apply to a single puzzle, please use the highest. |       |              |           |           |          |     |                   |                                                                                                                                                                                                                                                                                                                                                                                                                                       |        |                                                                                                                                                                                                                                                                        |               |                                                            |                                                                                                                                                                                                                                                                    |                     |               |  |  |  |  |
| FEN                                                                                                                                                                                                                                                                                                                                                                             | Board | Side to play | Realistic | Difficult | Creative | Fun | Counter intuitive | Comment (e.g., did you find this position creative, or not? why?)                                                                                                                                                                                                                                                                                                                                                                     | Rating | Board                                                                                                                                                                                                                                                                  | Closest Board | Closest FEN                                                | Principal Variation                                                                                                                                                                                                                                                | Edit Distance       | Themes        |  |  |  |  |
| <a href="#">d4k1pp1p2R1b1c2b7P1a7P1b7N2R4P1P1fP1bP1QD1u6c2R6K1w...0.1</a>                                                                                                                                                                                                                                                                                                       |       | w            | 1         | 3         | 3        | 3   | 2                 | Great puzzle. Maybe not as realistic though. The choice between Nd7 and Nd4 is very interesting. The right move, Nd4, allows White to block the check from the rook in some lines. What's also interesting is some of the lines where Black is hanging on to g7 by playing Rf6. The unrealistic part is the wayward Black pieces and that it is hard to imagine how the white rook ended up on g7.                                    |        |                                                                                                                                                                                                                                                                        |               | 4/r1k1pp3R2Q2q4P3qN3P1P2P2P5P7R4K2 w... - 2 29             | f8d4 d5d1 g7h2 Rf6f g4g5 f2g4 h2h3 g4d2 f3f2 d1h1 f2h3 h1h2 h3h2 a8f8 h3h3 Rf7 Rf6 f7f8 h4d4 Rf6g7 d7d8 c5d4 b3d4 h3d7 g6d6 a6d3 b3d4 c5d4 d6d7 h7h6 d7d7 h6g6 b7d7 c3d2 a7d7 b2d3 d7c7 c5d4 c7d8 d7d7 g4d5 e4g3 f5d5 b4d3 a5d4 g3d2 f4d4 c2d8 d3d2 d3d3 e4d5 f7d7 | 15 nov              | knight_on_f8_ |  |  |  |  |
| <a href="#">5r1h7P2qP2N2Q2q2R2b2Q2P2P1R6K1w...0.1</a>                                                                                                                                                                                                                                                                                                                           |       | w            | 3         | 2         | 2        | 2   | 1                 | White has to see Black's threat of checkmating on g1. The queen move to d3 saves the knight tactically because of black rank issues and White ends up a piece. The puzzle is less fun because it's limited in scope.                                                                                                                                                                                                                  |        |                                                                                                                                                                                                                                                                        |               | 5/r1k2pp3p8N1q2b2R5Q2P6P1R6K1 w... - 10 41                 | g3h5 f5d5 d3d3 h7h6 d5d4 d5f5 c3d3 g3c3 b4d3 c5c2 e4d2 c4d2 a3d2 f6d6 f3d4 h6g6 a3d2 d5d4 f4d6 d5d4 e5d7 e4d1 h1h2 e1d5 c7d8 d7d7 d3c7 f7f8 e5c5 e5d3 c7d7 c3d5 c3d3 c5d3 d5d4 e7d3 g3d3 d3d2 e4d5                                                                 | 3 sacrifice         |               |  |  |  |  |
| <a href="#">1k1np2N6pQP2q2b2c7Q2R2b1P3d4P1h1KNP2P2R6K1w...0.1</a>                                                                                                                                                                                                                                                                                                               |       | w            | 1         | 3         | 3        | 1   | 3                 | Not that realistic because of the white king position in the middle when many black pieces are on the back rank. The underpromotion idea and the sacrifice of the knight to begin with are interesting, but the result is not a win for white. That makes it not as much fun. The counterintuitive part is that Black should not take on d7 with the queen and that White should not promote to a queen.                              |        |                                                                                                                                                                                                                                                                        |               | 2q7k1p1pp1pQP2p1f5p2R6b4P4P1R1R3K1 w... - 1 25             | a7d5 e8d5 e5d7 b5d6 b5b7 c5b7 b7b8 d7d8 b5d6 b5d6 d3d3 d8d8 a7d7 d3d2 c7d1 e5d2 d5d4 b2d1 c3d4 a2d2 b7d8 d5d7 d5c7 d7b5 b4d5 f5d4 g4d3 g3h3 e7d2 e4c3 b3d3 c7d7 c3c2 c3c2 d3d4 c7d3 e1c3 d7d8 d3d4g4 e8f8 f5g8 f5h5 g8f5 g8f5 h5d6 f7f8                            | 14 underpromotion   |               |  |  |  |  |
| <a href="#">c1k1Q2qr1c1k1b1k1b1P2P1b1N3P2P1b2P2P2P1Q2K1w...0.1</a>                                                                                                                                                                                                                                                                                                              |       | w            | 1         | 3         | 3        | 2   | 2                 | Seems that White's position is pretty desperate, so only a few moves work. The puzzle is hard because it's easy to go wrong with so much effort in the material. It's not realistic because the position of the pieces do not make sense.                                                                                                                                                                                             |        |                                                                                                                                                                                                                                                                        |               | 1r1k1pp3pp4k1p1Q3Q2c1f7P1P2P1P1P17K1w... - 2 26            | g3d4 g7h6 e2h2 b4f5 g3d7 a7d3 h4b e8f5 g4d5 e3f5 h3d3 g3h6 e7g5 h6g7 g3h6 g7h6 e8f7 d3c1 d5d1 c7d1 h1h2 d1h1 h2h1 f5g3 g3d3 a8d1 h1h2 a1d2 b3d3 d3d3 d3d3 d3d3 c3d3 c7d7 c3c2 c3c2 d3d4 c7d3 e1c3 d7d8 d3d4g4 e8f8 f5g8 f5h5 g8f5 g8f5 h5d6 f7f8                   | 15 novelty          |               |  |  |  |  |
| <a href="#">d61M2p2Q2Q3P1k1p2P1P2P1P2P1P2P1P2P1P2K1w...0.1</a>                                                                                                                                                                                                                                                                                                                  |       | w            | 3         | 3         | 3        | 3   | 3                 | This is a great puzzle! Rd8 as the first move is counter intuitive and creative. In the main line, the move d5 is also excellent.                                                                                                                                                                                                                                                                                                     |        |                                                                                                                                                                                                                                                                        |               | h6pp4pp4Q2Q3k1p1Q3Q2c1f7P1P2P1P1P1P1P1P1P1P17K1w... - 1 32 | c7d8 a2d3 g3f7 h6g6 d4d5 b3d1 h1h2 e1d5 f7d8 g3h6 c5d8 h5g6 e5d3 h6g6 c3d7 g3h6 d5d8 f5d8 g3f7 a8f8 f7g6 f5d8 g3h6 e5d4 h5f7 a5d4 h6g6 e4g5 f7d7 e5d8 a7d7 g3f7 g3f7 g3h5 f3d5 d7d8 d6d7 d5d4 e5d3 h4d7 d7d8g4 g7h6 e7h6 d4d1 f5d6 e8f7 h7f7 d5g7 h6g7 e1d4 g7h6   | 10 novelty          |               |  |  |  |  |
| <a href="#">L4d4pp1b1Q1L1b6P2P1P2P1P2P1P2P1P2P1P2P1P2K1w...0.1</a>                                                                                                                                                                                                                                                                                                              |       | w            | 3         | 3         | 3        | 3   | 3                 | This is an amazing puzzle! It's not clear which of the knight moves are best for White. Black's threat of perpetual with Ng2-Kf2-Nf1+ needs to be parried. Nd5 fails to Ng4+, but with Nd6, White can block c2+ with Nd5d4. There are a lot of small details that matter in this position, which makes this puzzle hard but fun. For example, in some lines, the knight being on f1 for Black blocks Black's check on the white king. |        |                                                                                                                                                                                                                                                                        |               | h6pp1b1Q2P2q5P5b7P1P1P1P1P1P1P1P1P1P17K1w... - 10 28       | g7h6 f7h3 h1h2 g3h1 h2g1 e3d2 b3d4 b5d4 e5d4 d5g6 f7d5 h6g6 h5d6 g7h7 h5d6 f7d5 h5g6 f5g6 e5d8 d4d2 c3d5 g3h5 f7h6 f7f7 d5d7 e2d4 c5c1 f7h2 a5d3 g3h6 f7h6 g5d5 c7c7 f5g6 e5d4 g5h4 d7d6 g7h6 e7h6 e3d4 h7d7                                                       | 14 attacking_w/rook |               |  |  |  |  |
| <a href="#">4r1k1p2pp1b2pp1pP1R2Q2P1k1P1P1P1P1P1P1P1P1P1K1w...0.1</a>                                                                                                                                                                                                                                                                                                           |       | w            | 3         | 3         | 3        | 3   | 3                 | It's quite a creative one! The black queen ends up being trapped after Qa3-e3d3 Re4d3-Kf7-Kf2. A move like B1 is not with the greatest Rf6+ when the queen, and therefore the king, continues to be trapped. It's a fun pattern. The impending castling is quite unique too.                                                                                                                                                          |        |                                                                                                                                                                                                                                                                        |               | 4/r1k1p2pp1b2pp1pP1R2Q2P1k1P1P1P1P1P1P1P1P1P1K1w... - 2 26 | e2d3 e8f8 e3d4 f5d4 e4d2 b7d8 d3c2 a8d8 c2d4 e8f8 e4d3 f5d4 h3d3 h5d5 c5d4 e8f8 e4d3 f5d4 g5d1 f5d5 e1f5 h5d5 e5d4 b3d4 c3d4 c3d4 a8d8                                                                                                                             | unprotected_pawn    |               |  |  |  |  |
| <a href="#">d4k1b2c2pp1pP1P1P1P1P1P1P1P1P1P1P1P1P1K1w...0.1</a>                                                                                                                                                                                                                                                                                                                 |       | w            | 1         | 3         | 1        | 1   | 3                 | All the white pieces are on the back rank and all the black pieces are developed. It's strange. On top of that, the best move is the weird Rd4, but it's equal anyway. All of that makes it not fun.                                                                                                                                                                                                                                  |        |                                                                                                                                                                                                                                                                        |               | 4/r1k1b2c2pp1pP1P1P1P1P1P1P1P1P1P1P1P1P1K1w... - 0 16      | e1d4 a8d8                                                                                                                                                                                                                                                          | 3 interference      |               |  |  |  |  |
| <a href="#">8Q2P2P1b2b2Q2P1P2P2P1P2P2P1P2P2P1P2P2P1K1w...0.1</a>                                                                                                                                                                                                                                                                                                                |       | w            | 3         | 3         | 3        | 3   | 3                 | Not Qd3-Bh2! Qd3-Nf5 is a brilliant idea. I have not seen anything like this before. The queen gets locked out and White is threatening f4 followed by c3f4. And Nd5 is related to the knight king on d7. Amazing. Highly counter-intuitive and requires a lot of creativity to come up with the solution.                                                                                                                            |        |                                                                                                                                                                                                                                                                        |               | 4k3Q2P2P1b2b2Q2P1P2P2P1P2P2P1P2P2P1P2P2P1K1w... - 0 31     | f8d4 d2d3 f7h6 f8f e4f5 f8d8 c2c3 d4d5 f5d7 e5f5 d7d8 a5d5 b3d5 e5d5 a5c5 g7h6 c2d3 g3d3 g3d3 c3d4 g3d4 g3d4 e5d4 c3d4 f5d4 e5d4 d4d5 d5c7 e4d5 e7h6 e5d4 h5f7                                                                                                     | 10 switchback       |               |  |  |  |  |











[illegible]







[illegible]
