# Supplementary material
Source: ML conference proceedings conference paper supplement (https://openreview.net/forum?id=TNZse5q2Tr)
Supplement: supplementary_material [file Chess_Booklet___NeurIPS_2025_Creative_AI_Track.pdf › supplementary/Chess_Booklet___NeurIPS_2025_Creative_AI_Track.pdf]

---

# Evaluating In Silico Creativity: An Expert Review of AI Chess Compositions

---

Vivek Veeriah<sup>1</sup> Federico Barbero<sup>2\*</sup> Marcus Chiam<sup>1</sup> Xidong Feng<sup>1</sup> Michael Dennis<sup>1</sup>  
Ryan Pachauri<sup>1</sup> Thomas Tumiel<sup>1</sup> Johan Obando-Ceron<sup>3\*</sup> Jiaxin Shi<sup>1</sup> Shaobo Hou<sup>1</sup>  
Satinder Singh<sup>1</sup> Nenad Tomašev<sup>1</sup> Tom Zahavy<sup>1</sup>

<sup>1</sup>Google DeepMind <sup>2</sup>University of Oxford <sup>3</sup>Mila, University of Montreal  
{vveeriah, xidong, tomzahavy}@google.com

The rapid advancement of Generative AI has raised significant questions regarding its ability to produce creative and novel outputs. Our recent work investigates this question within the domain of chess puzzles and presents an AI system designed to generate puzzles characterized by aesthetic appeal, novelty, counter-intuitive and unique solutions. We briefly discuss our method below and refer the reader to the [technical paper](#) for more details. To assess our system’s creativity, we presented a curated booklet of AI-generated puzzles to three world-renowned experts: International Master for chess compositions [Amatzia Avni](#), Grandmaster [Jonathan Levitt](#), and Grandmaster [Matthew Sadler](#). All three are noted authors on chess aesthetics and the evolving role of computers in the game. They were asked to select their favorites and explain what made them appealing, considering qualities such as their creativity, level of challenge, or aesthetic design. This paper presents these selected puzzles, integrating the experts’ analysis to explore what makes them counter-intuitive and beautiful.

**Generating millions of chess puzzles:** Our method involves training generative neural networks (Auto-Regressive Transformer, Discrete Diffusion, and MaskGit) on a dataset of 4 million chess puzzles from Lichess<sup>1</sup> to learn the distribution of those puzzles. Each position was encoded as a sequence using Forsyth-Edwards Notation (FEN), and a neural network was trained to predict the distribution of the next character in the string based on the characters that preceded it. The trained network was then employed as a generative model to sample chess puzzles, starting from the first character of the FEN and iteratively sampling the remaining characters. We further trained the generative neural network with reinforcement learning. This involved a custom reward design, which was used to select the best samples and iteratively train the network to generate puzzles with higher rewards. The reward function had two parts: a uniqueness check, similar to the one used in Lichess, to ensure there was only one winning move; and a counter-intuitiveness check, to ensure the position could be solved by a strong chess engine but not a weak one.

**Selecting puzzles by reward:** We generated approximately 4 million chess positions from the aforementioned models and filtered them using a hybrid approach. Positions were first ranked by a reward function, then processed by aesthetic theme detectors. While the detectors were imprecise alone, their effectiveness was greatly enhanced by the initial reward-based ranking. To find good puzzles, we manually reviewed the top 50 samples for each theme, a process validated with FIDE players in the 2200 - 2300 rating range.

**Chess booklet:** A collection of selected puzzles was compiled into a booklet (Appendix [A](#)) and was sent for review. The experts’ feedback was generally positive; they noted the innovative fusion of aesthetic themes and the "over-the-board" vision. Nevertheless, the reviewers also provided constructive criticism, pointing out that some positions were trivial, while the collection overall lacked the profundity and complexity of traditional endgame studies. They also remarked that certain puzzles were unrealistic. For future development, they recommended increasing the complexity and depth of the positions, incorporating problems with more complex sidelines and robust counter-play, and wanted to see more surprising theme combinations.

---

\*Research conducted during an internship at Google DeepMind

<sup>1</sup><https://database.lichess.org/#puzzles>

**Creativity in chess:** For the scope of this work, we broadly identify a chess puzzle as creative when its solution contains a sense of surprise, challenge, and beauty. Of course, a precise measure of creativity is hard to define and largely subjective – we found in our study that even very strong chess experts frequently differ in their assessments of a puzzle’s creative merit. There are many factors that may influence the assessment, for instance, the player’s skill level, prior exposure to similar tactical patterns, and general individual aesthetic preferences. A puzzle may be deemed creative if it presents an uncommon exposition of a familiar theme (e.g. Puzzle 9 contains the classic smothered mate theme) or if its solution requires counter-intuitive moves (e.g. Puzzle 1). The following section lists the puzzles highlighted by the experts.

## Comments from chess experts

The experts’ diverse preferences for the puzzles underscore the highly subjective nature of beauty and creativity in chess, as they rarely agreed on which were the most compelling. This review will begin with overall commentary on the booklet before discussing the one puzzle that earned unanimous praise. From there, we will delve into the specific puzzles that appealed to each expert individually, along with their comments.

**IM for chess compositions Amatzia Avni:** This booklet adds novel, AI-generated puzzles to the existing chess literature, serving as a resource for both training and enjoyment. A valuable chess puzzle should be original and creative, with a surprising, counter-intuitive key move and a smart follow-up. The ideal puzzle is also aesthetically pleasing and offers a satisfying, flowing solution. It must strike a good balance in difficulty – challenging enough to avoid being obvious, but not so hard as to cause frustration. I selected Puzzles 2, 3, 4 as they met my expectations and have described them in the next section.

**GM Jonathan Levitt:** For years, chess composers have worked with computers to verify soundness of their work and thus assist in the process of creation too. This nature of collaboration is evolving, with AI now capable of generating interesting chess positions, beyond just “mining” databases. The positions in this booklet represent a pioneering step in this human-AI partnership. While these initial AI-generated endgame compositions are not yet at a prize-winning level, they clearly demonstrate the potential to be. I have highlighted some of my selections as Puzzles 5 and 6 in the next section.

**GM Matthew Sadler:** It was an intriguing experience to assess the chess booklet. I have strong preferences about what makes a good puzzle position. In particular, I favor natural positions resulting from reasonable play by both sides. Puzzles lose my interest if one side’s pieces are clearly misplaced or if a complex solution yields a minimal advantage, like being up a single pawn after sacrificing multiple pieces. Even with those stringent conditions, I enjoyed many of the positions in this booklet of which I will highlight a small selection (Puzzles 7, 8, 9) in the next section.

We will be referring to IM for chess compositions Amatzia Avni as **AA**, GM Jonathan Levitt as **JL** and GM Matthew Sadler as **MS**.

## A puzzle that intrigued all the experts

The puzzle position that all experts agreed to be beautiful is shown on the right. White has aggressively placed pieces, but an exposed King on f2 and a misplaced Queen on a7. White has to manage to mount an attack that does not allow counter-play. Only one move in the position achieves all this.

The winning move is **1 ♖g6+!**, which **AA**, **JL** and **MS** described as “unorthodox” and by “no means natural or obvious sacrifice”. The move starts the attack by giving up both rooks at once! **AA** further described the move as “certainly not what you would take into considering as the first candidate move”.

After **1 ♖g6+!**, either rook can be captured: After **1... ♖xg6** or **1... ♗xg6**, the continuations are similar. Choosing to capture with the King **1... ♔xg6** leads to **2 ♗a1!** and after black captures the second rook **2... ♗xg6** **3 ♗f6+**, white has an unstoppable attack and is covering all of the checks from the black Queen. The puzzle is paradoxical as the solution

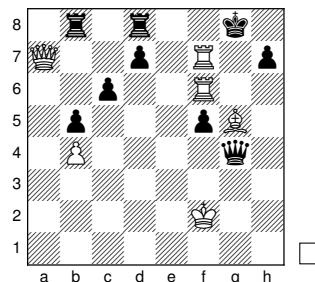

Puzzle 1: AI-generated puzzle with unanimous acclaim from the experts. [\[Analyse on Lichess\]](#)

involves sacrificing *both* very active Rooks to prepare the slow repositioning and infiltration of the misplaced Queen on a7. Further, the combinations are geometric and involve participation of pieces from both flanks. They are difficult to find even for a strong player.

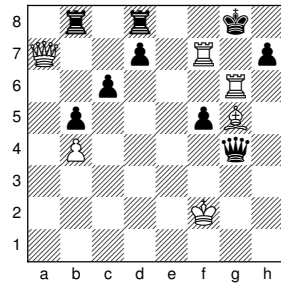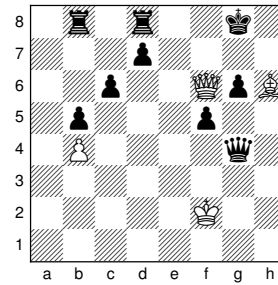

**Puzzle 1:** (Left) After playing **1 ♖g6+** where both Rooks are left unprotected. (Right) Continuing with **1... ♜xf7 2 ♜a1 h×g6 3 ♜f6+ ♜g8 4 ♜h6!** avoiding the tempting **4 ♜xg6+**, after which victory slips away. White is completely winning at the end of the variation. **AA** describes this as a “short, yet challenging puzzle” with an aesthetically pleasing ‘long’ move, performing both attacking and defensive missions; while initiating a vicious threat, it continues to guard against the black Queen checks.

**MS** liked the retreats and the geometrical motifs (**2 ♜a1 3 ♜f6+**), noting that they are very engine-like and tricky for humans to spot, requiring vision over the whole board. The touch of leaving the Rook on f7 *en prise* while covering the check on d4 with the Queen on a1 is particularly fine.

**JL** described this position as a very good combination involving the paradox (and limited depth) of the initial sacrifice, the geometry of the long queen move, and one or two nice variations before the final goal is established. The initial sacrifice needs to be accurately calculated, you need to see the long queen move (**2 ♜a1**), which is not at all typical and thus harder to see than a normal move.

#### Selected Puzzles with Commentary from IM for Chess Compositions Amatzia Avni

**Puzzle 2** (Left) shows the first highlighted puzzle. Here **1... ♜c3** requires a long calculation, since white has counter play, and the black king does not hesitate to move forward into the danger zone. Alternative lines of play including **1... e3 2 ♜b5** and **1... ♜b1+ 2 ♜xd2 ♜c3+ 3 ♜xc3 ♜c1+ 4 ♜b3 ♜b1+ 5 ♜a3** appear fancy but are unproductive. The solution continues with **2 ♜e5+ ♜f6 3 ♜g6+ ♜xf5 4 ♜xc8+ ♜xc8 5 ♜g4+ ♜xf4 6 ♜xc8 ♜xe5** leading to a win for black. This mainline of play is counter-intuitive and is not easy to assess beforehand.

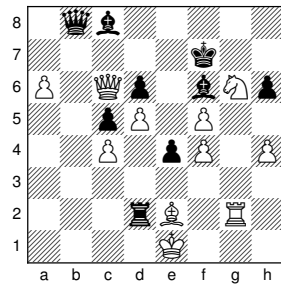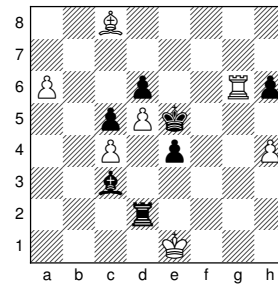

**Puzzle 2:** (Left) Puzzle position [[Analyse on Lichess](#)]. (Right) After playing **1... ♜c3 2 ♜e5+ ♜f6 3 ♜g6+ ♜xf5 4 ♜xc8+ ♜xc8 5 ♜g4+ ♜xf4 6 ♜xc8 ♜xe5**, which leads to a winning position for black.

**Puzzle 3** involves a slightly imbalanced position favoring black in terms of material advantage, though most of the material is not developed. The position begins with the white Rook on f7 hanging as it is under threat by the King on g8.

**1 ♜e7!** is the first move of the puzzle. This allows black to capture the Rook, though it removes an important flight square from the King. The solution continues with **1... ♜xe7 2 ♜h8+ ♜f7 3 ♜e5+ ♜f6 4 ♜h5!!** produces a quiet move to crown the combination, as shown in Figure 3 (Right). Continuing with **4... ♜c7 5 ♜xe8**, where white is still down in material, but has a winning attack.

While black begins with enormous material advantage, the player is helpless in the above position. An alternative line with the obvious sequence of moves fails to deliver: **4 ♜h4+ g5 5 f×g6+ ♜g7**

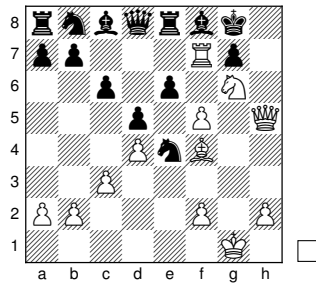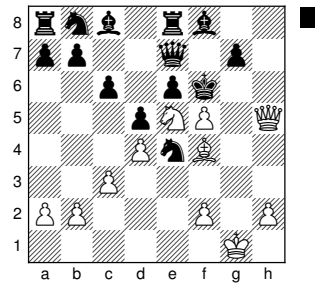

Puzzle 3: (Left) Puzzle position [Analyze on Lichess]. (Right) Position after playing 1 ♖e7! ♜xe7 2 ♜h8+ ♝f7 3 ♞e5+ ♝f6 4 ♜h5!!. Continuing with 4... ♜c7 5 ♜xe8, white is winning.

6 ♜h7+ ♝f6 7 ♜h8+ ♞g7?? (After the correct 7... ♜g7 white must be satisfied with producing perpetual checks). Black succumbs to a devious trap with mate with two self-blocks: 8 ♜h4+ ♝f5 9 ♜g4+ ♝f6 10 ♞g5+! ♞xg5 11 ♜f4#.

**Puzzle 4** (Left) shows the next highlighted puzzle. The solution to the puzzle begins with 1 ♜e6 ♞xe7 2 d8♞!. The alternative line 1 d8♜ ♞xd8 2 ♜xd8 ♜xe7 loses. 2 ♜xe7 ♞xd7 3 ♞xd7 ♜xd7 4 ♜xd7 ♞b4 is unclear; 2 d8♜+ is begged to be played after 1 ♜e6 ♞xe7, but the paradoxical response 2... ♞f8!! will leave us shocked. The new Queen on d8 is lost, after which black gains the upper hand, for instance 3 ♜f5 ♞xd8 4 ♞xd8 ♜h1+ 5 ♞d1 ♜a8 6 ♞f1 ♞d6. The puzzle's solution continues with 2... ♜f3 3 ♞f7+ ♜xf7 4 ♜xf7 ♞f8 5 bxc4+, leading to a win for white.

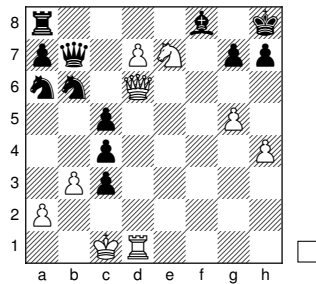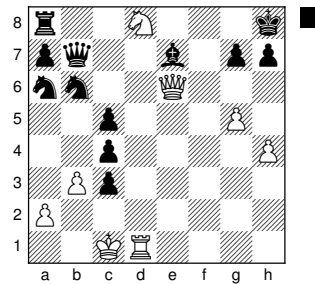

Puzzle 4: (Left) Puzzle position [Analyze on Lichess]. (Right) After under-promoting the pawn with 1 ♜e6 ♞xe7 2 d8♞!, white eventually gains an upper hand.

### Selected Puzzles with Commentary from GM Jonathan Levitt

**Puzzle 5** is a position that could easily be from a real game. White needs to find a fine sequence of exact moves to convert the point and the play flows across the board in a pleasing way. There are only minor aspects of paradox involved in the moves (for example capturing only a pawn on the first move when a piece is *en prise*), but it would score reasonably well on geometry, flow and depth. All in all, this puzzle is very close to becoming endgame study material. A study composer might try to extend this a move or two at the beginning and introduce a strongly paradoxical sacrifice to set up the starting position... then it would have a little bit of everything.

The mainline of play starts with 1 cxd4 ♞xg2 which is not at all easy and involves rejecting the variations 1 ♝xd4 which is reasonable, but only draws with optimal play, and also 1 dxe3? dxc3 2 ♝b6 ♞d3 where black is winning.

The solution to the puzzle continues with 2 ♝b6 ♞c8 3 ♞c6 ♞f4 4 ♞b7 ♞xb7 5 ♝xb7 ♞d5 6 b5 ♞b4 7 bxa6 ♞xa6 8 ♝xa6 f5 9 ♝b6 f4 10 a6 f3 11 a7 f2 12 a8♜ f1♜ 13 ♜g8+ and white will pick up the e7 pawn with a winning position.

**Puzzle 6** is an elegant endgame position and is close to being endgame study standard. The position has a slight advantage to white in terms of material. The mainline of play is 1... a2 2 ♞d1 ♞f5!, which leads to black threatening with 3... ♞b1, which would secure promotion. Now, 3 ♞e1 ♞d8! prevents white from transferring the Rook behind the passed pawn. The solution continues with 3

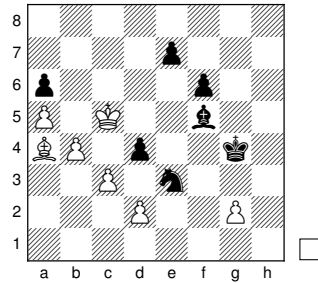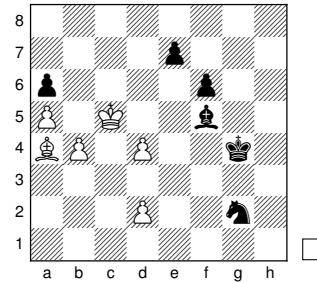

Puzzle 5: (Left) Puzzle position [\[Analyse on Lichess\]](#). (Right) After playing **1 cxd4**  $\text{N}\times\text{g2}$ , a counter-intuitive start to the variation.

**f1**  $\text{Qd8!!}$ , which is an elegant little move that finishes white off. Note that black cannot immediately play **3... b1?** due to **4**  $\text{R}\times\text{f7+}$ . After **3... Qd8**, the line can continue with **4**  $\text{Qc6}$   $\text{Bb1}$  **5**  $\text{R}\times\text{f7}$   $\text{Qe4+!}$  which leads to black promoting to a Queen. The solution continues with **4**  $\text{Ra1}$   $\text{Bb1}$ , where white is now completely paralyzed. Black has the simple plan of pushing the f and h pawns and wins this position without much effort.

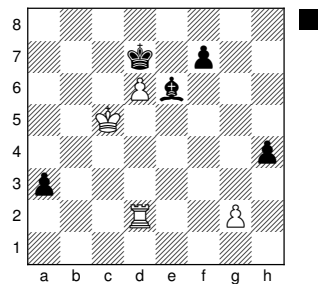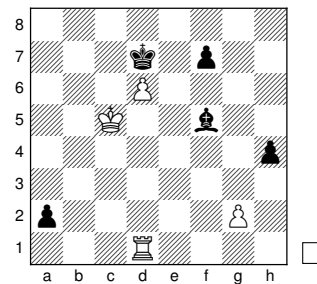

Puzzle 6: (Left) Puzzle position [\[Analyse on Lichess\]](#). (Right) After playing **1... a2** **2**  $\text{Rd1}$   $\text{Qf5!}$ , black is in position to threaten moving the Bishop to b1 on the next move.

### Selected Puzzles with Commentary from GM Matthew Sadler

In **Puzzle 7**, the key to the position is extremely nice. Within a couple of moves, a combination of themes was achieved which leaves a very elegant impression. This combination of an under-promotion with a smothered mate is not something I've seen before!

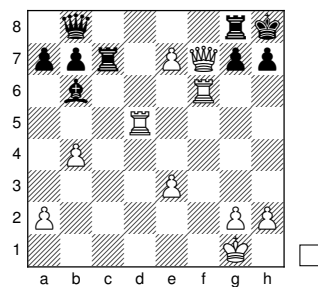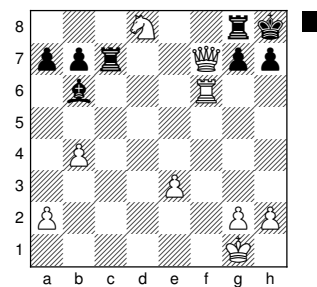

Puzzle 7: (Left) Puzzle position [\[Analyse on Lichess\]](#). (Right) After under-promoting the pawn into a Knight with **1**  $\text{Rd8}$   $\text{Q}\times\text{d8}$  **2**  $\text{e}\times\text{d8Q}$ .

**1**  $\text{Rd8}$   $\text{Q}\times\text{d8}$  seemingly a clever defense, exploiting the pin on the pawn on e7 by the rook on c7 as **1... Rxd8** **2**  $\text{Qf8+}$ . However **2**  $\text{e}\times\text{d8Q}$  introduces a very unusual smothered mate motif, which I don't think I've ever seen before combined with an under-promotion! The only shame is that black has a way to lead the game into a position where white still has to work hard for the win! **2**  $\text{e}\times\text{d8Q}$  is met by **2... Rxf7**. The mainline of play continues with **2... Rc1+** **3**  $\text{Rf1}$   $\text{Q}\times\text{e3+} **4**  $\text{Qh1}$   $\text{R}\times\text{f1+} **5**  $\text{Q}\times\text{f1}$   $\text{R}\times\text{d8}$  **6**  $\text{g3}$ . Engines assess this as a winning position for white. The position is a touch unnatural perhaps - the rook on c7 and queen on b8 make a poor impression - but not enough to cause any upset.$$

**Puzzle 8** shows an extremely surprising puzzle where the threats and counter-threats against both Kings leave you in doubt as to the correct result until the very last move!

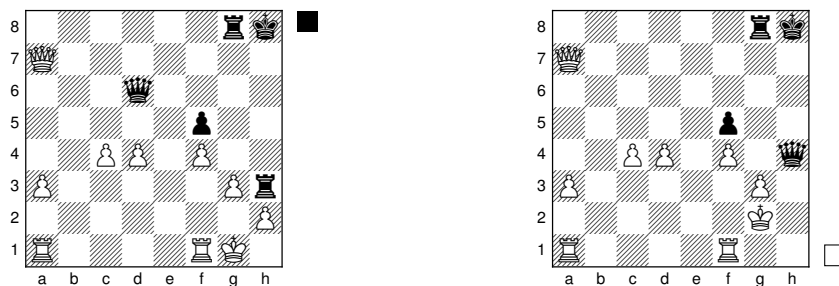

Puzzle 8: (Left) Puzzle position [Analyse on Lichess]. (Right) After playing the non-obvious line 1... Rxf2 2 Qxh2 Qh6+ 3 Kg2 Qh4.

1... Rxf2 2 Qxh2 Qh6+ 3 Kg2 Qh4 is the correct non-obvious line. The nice point about this puzzle is how many "obviously winning" lines fail! 4 Rf3 is the most obvious defense and seemingly ends the game! The line continues with 4... Rxf3+ 5 Rxf3 Qh2+ 6 Qf3 Qf2+ 7 Qxf2 which leads to a very unexpected stalemate! The alternative line of play 4 Rf1 involves pinning the Queen to the King, and will lose to 4... Rxf3+ 5 Qf2 Rf3+ 6 Qe2 Qg4+ 7 Qd2 Qg2+ 8 Qc1 Rxf1#.

**Puzzle 9** is another lovely combination of themes, adding a diversion to a typical smothered mate motif!

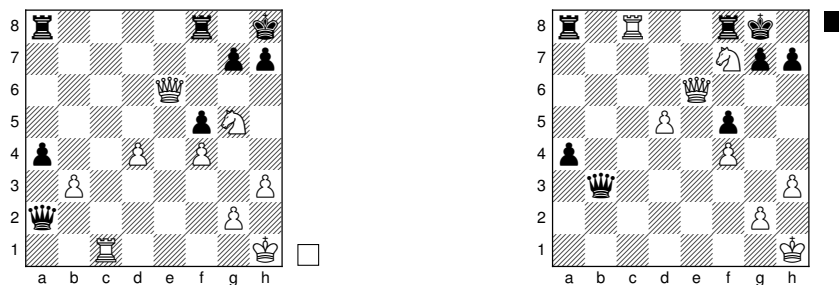

Puzzle 9: (Left) Puzzle position [Analyse on Lichess]. (Right) After playing 1 Rf8 Qxb3 2 Qf7+ Qg8 3 d5.

1 Rf8 Qxb3 is the initial sequence of moves. The opponent has two other responses to the first move, each of which leads to a short mate sequence. Specifically, those alternative lines are 1... Rxf8 2 Qf7+ Qg8 3 Qh6+ Qh8 4 Qg8+ Rxf8 5 Qf7# and 1... Rxf8 2 Qf7+ Rxf7 3 Qxc8+, which ends with a back-rank mate. The puzzle solution continues with 2 Qf7+ Qg8 3 d5, which produces another neat addition to the puzzle as shown in Puzzle 9 (Right).

3... h6 is the most natural human defense in this position, but that is followed with 4 Qe5+ Qh7 5 Qg6+ Qh8 6 Rf7. The chess engine at this point estimates all lines as winning for the white player.

## Discussion

Our work demonstrates a significant advancement in the AI-driven generation of creative chess puzzles. We developed a puzzle generation approach with AI and produced a booklet of chess puzzles which, upon review by chess experts, received positive feedback. The positions in this booklet represent a pioneering step toward human-AI partnership in chess composition, and the experts who reviewed them highlighted several key qualities: they were beautiful, counter-intuitive, introduced novel variations on existing themes, and were aesthetically pleasing to solve. They particularly enjoyed puzzles with natural-looking positions and those that were original, paradoxical, and surprising. We also observed that the experts often selected different puzzles as their favorites, which suggests that creativity and beauty in chess are highly subjective.

Our work provides a new framework for discovering novel concepts, moving beyond known patterns and motifs. The methodology can be extended to support creative puzzle co-creation with human experts. Ultimately, we plan to generalize these results beyond chess, first to other board games and then to broader problem-solving domains.

## References

A. Avni. *Creative Chess*. Everyman Chess, 1991.

J. Levitt and D. Friedgood. *Secrets of Spectacular Chess*. Everyman Chess, 1995.

T. H. Persson. *Tiger's Chaos Theory*. Quality Chess, 2024.



## A Creative Chess Puzzles Booklet

The appendix presents the booklet of chess puzzles created using Artificial Intelligence (AI) techniques. This is a brief, non-technical summary of the methods used; for more detail, please refer to the paper.

### A.1 Sacrifice

Book example:

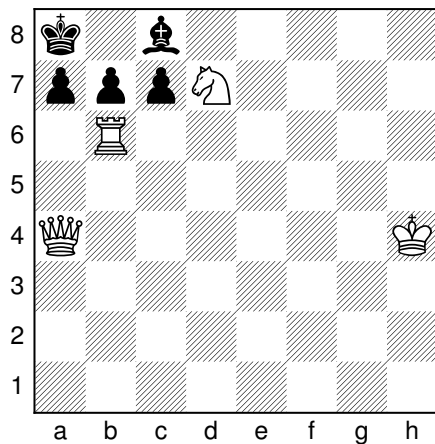

[\[Analyse on Lichess\]](#)

Selected puzzles:

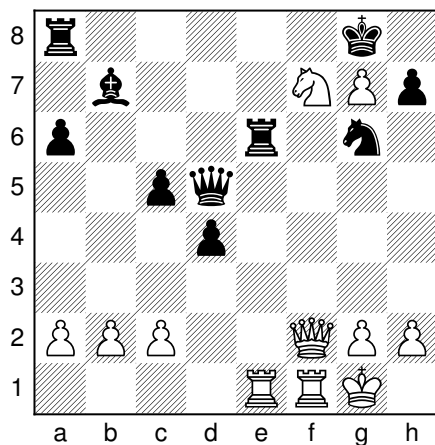

[\[Analyse on Lichess\]](#)

Closest FENs - [1], [2], [3]

1. Nd8! The knight is sacrificed two ways, but cannot be captured due to Qf7#. Black is forced to give up material. Qxg2+ 2. Qxg2 Bxg2 3. Rf8+! An intermezzo sacrifice that aims to liquidate. Nxf8 4. gxf8=Q+ Kxf8 5.

Nxe6+ Kf7 6. Kxg2 White plays the endgame up a piece.

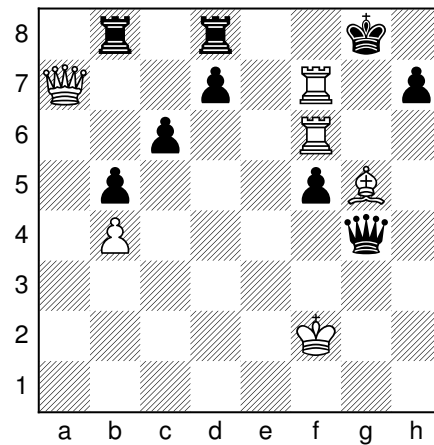

[\[Analyse on Lichess\]](#)

Closest FENs - [1], [2], [3]

1. Rg6+! White gives up both rooks to open up the a1-h8 diagonal. Capturing either rook eventually transposes to the same position. hxg6 2. Qa1! Kxf7 3. Qf6+ Kg8 4. Bh6 and White covers all the checks.

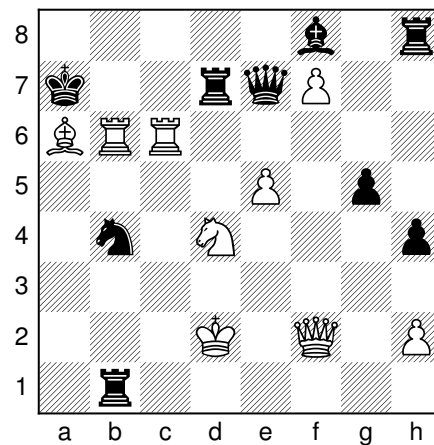

[\[Analyse on Lichess\]](#)

Closest FENs - [1], [2], [3]

1. Rb7+! White gives up the rook to open the diagonal for the queen. Rxb7 2. Nb5+ Kb8 3. Qa7+ sacrificing the queen to finish the game. Rxa7 4. Rc8#.



## A.2 Underpromotion (Levitt and Friedgood, 1995)

Book example:

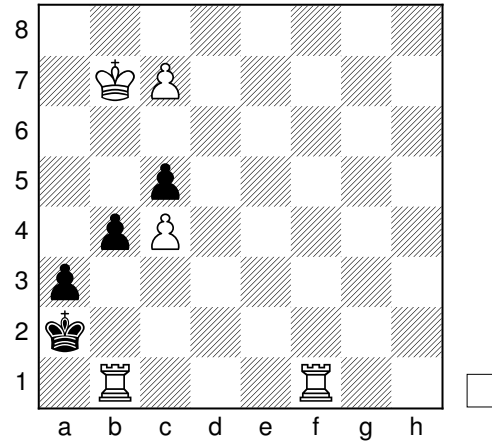

[\[Analyse on Lichess\]](#)

Closest FENs - [\[1\]](#), [\[2\]](#), [\[3\]](#)

1. Qg8+ Nxg8 2. Rh7+ Nxh7 3. Ng6# A creative example of a smothered mate.

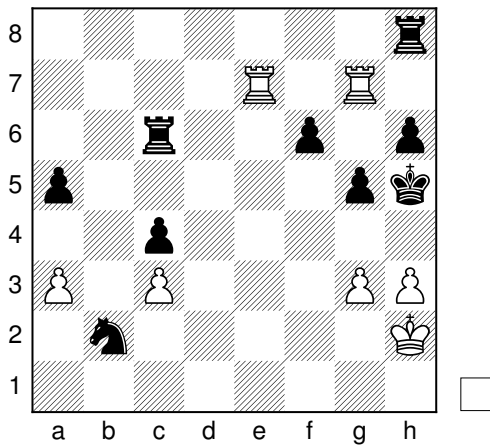

[\[Analyse on Lichess\]](#)

Closest FENs - [\[1\]](#), [\[2\]](#), [\[3\]](#)

1. Re4 Setting up a mating net. f5 2. Rh4+! gxh4 3. g4+ fxg4 4. hxg4#.

Selected puzzles:

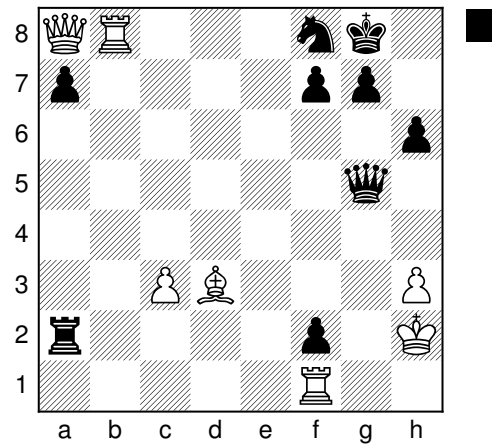

[\[Analyse on Lichess\]](#)

Closest FENs - [\[1\]](#), [\[2\]](#), [\[3\]](#)

1... Qg1+! Black gives up the queen to set up the underpromotion and mate. 2. Rxg1 f1=N+! 3. Kh1 Rh2#.

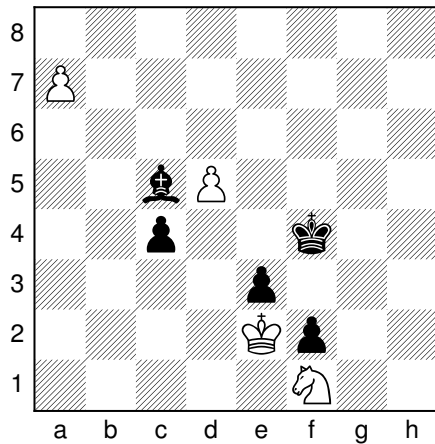

[\[Analyse on Lichess\]](#)

Closest FENs - [\[1\]](#), [\[2\]](#), [\[3\]](#)

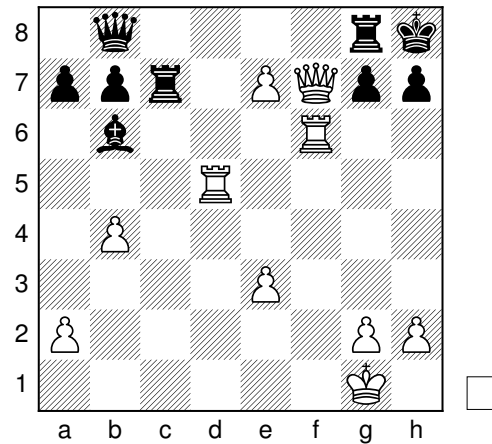

[\[Analyse on Lichess\]](#)

Closest FENs - [\[1\]](#), [\[2\]](#), [\[3\]](#)

1... Bxa7 2. d6 c3 3. d7 The position looks like it is heading for a draw as it seems like the black bishop has to stop White's pawn. Black however has another idea in mind. c2! 4. d8=Q c1=N! The only winning line! Black underpromotes with tempo. 5. Kd1 e2+ 6. Kc2 exf1=Q Black can eventually escape the checks finding shelter on g1 covered by the new queen.

1. Rd8! White exploits Black's back-rank issues. Qxd8! 2. exd8=N! Underpromoting to a knight is the only move that wins! Rc1+ 3. Kf2 Bxd8 4. Re6 White is up a material with a winning position.

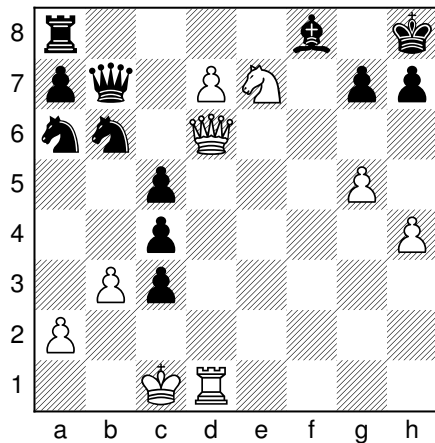

[\[Analyse on Lichess\]](#)

Closest FENs - [\[1\]](#), [\[2\]](#), [\[3\]](#)

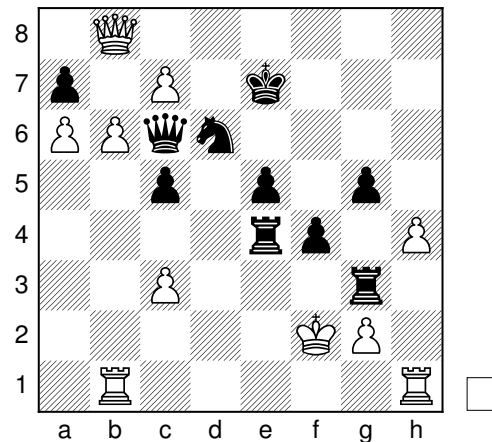

[\[Analyse on Lichess\]](#)

Closest FENs - [\[1\]](#), [\[2\]](#), [\[3\]](#)

1. Qe6 Threatening mate. Bxe7 2. d8=N! Underpromoting to threaten a smothered mate. White's best option is to give up material. Qf3 3. Nf7+ Qxf7 4. Qxf7

1. c8=N! White underpromotes to a knight. Nxc8 if 1... Qxc8 2. Qxc8 Nxc8 3. b7 or if 1... Ke6 2. Qxd6 Qxd6 3. Nxd6 2. Qb7+! Forcing matters. Kd6 3. Qxc6 Kxc6 4. b7.

### Selected puzzles:

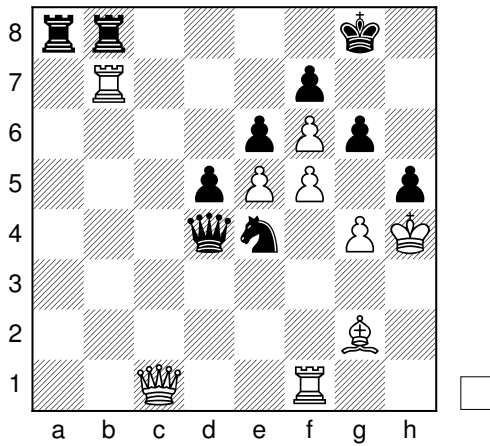

[\[Analyse on Lichess\]](#)

Closest FENs - [\[1\]](#), [\[2\]](#), [\[3\]](#)

1. Rxb8+ Rxb8 2. fxg6 Nd2 If 2... fxg6 3. Qc7 wins. 3. gxf7+ Kh7! 4. f8=N+! Kh6! 5. Be4! An underpromotion followed by a stunning bishop sacrifice. Black cannot capture the bishop. Qe3 6. Nxe6 White ends up with a large material advantage and should convert quickly with careful play.

### A.3 Attacking Withdrawal (Avni, 1991)

Book example:

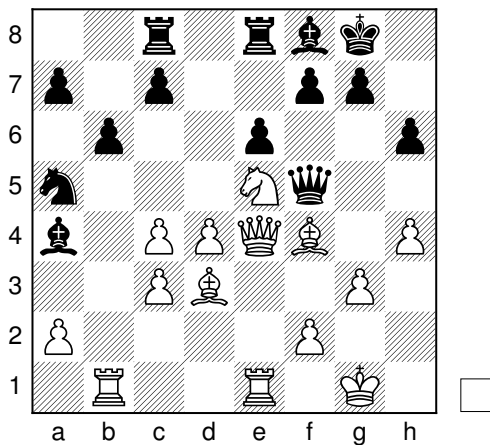

[\[Analyse on Lichess\]](#)

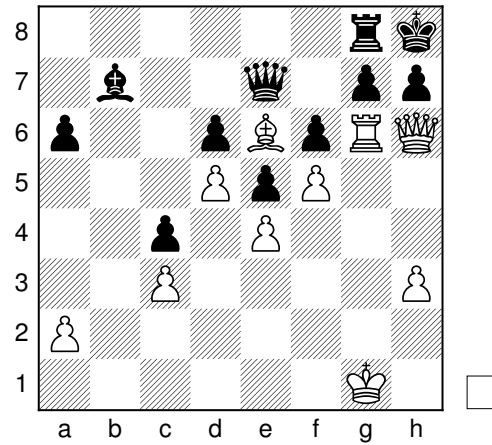

[\[Analyse on Lichess\]](#)

Closest FENs - [\[1\]](#), [\[2\]](#), [\[3\]](#)

1. Rg4 White retreats the rook and sets up the threat of 2. Qxh7+ Kxh7 3. Rh4#. g5 2. Bxg8 Kxg8 3. h4 and White is quickly breaking through.

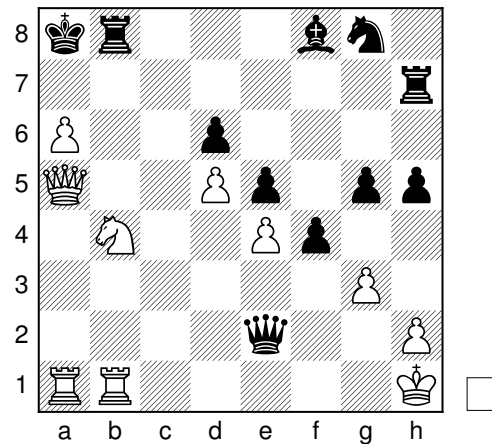

[\[Analyse on Lichess\]](#)

Closest FENs - [\[1\]](#), [\[2\]](#), [\[3\]](#)

1. Nc2! The white knight retreats and sacrifices itself to gain valuable time. Qxc4+ 2. Kg1 Qxc2 3. Rxb8+ Kxb8 4. a7+ Rxa7 5. Qxa7+ and White has an unstoppable attack.

#### A.4 Knight on the Rim is Dim (Persson, 2024)

Book example:

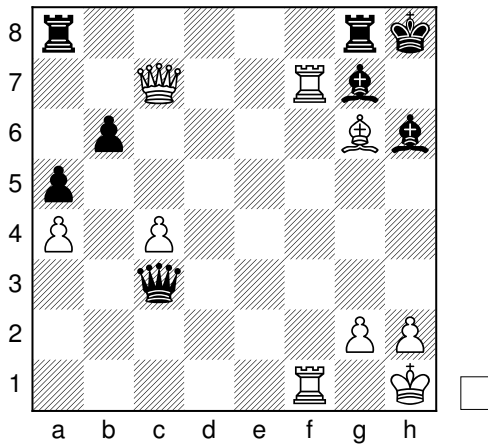

[\[Analyse on Lichess\]](#)

Closest FENs - [\[1\]](#), [\[2\]](#), [\[3\]](#)

1. Bb1! White withdraws the bishop from the attack with the goal of setting up a bishop-queen battery. It turns out that this plan is largely unstoppable. Qb4 Engine also gives Bg5, but after 2. R7f3 Black has to depart with the queen and is defending with less material.  
2. Qc6 Threatening both 3. Qg6 and 3. Qxh6!.  
Black cannot defend. Rgd8 3. Qg6 Qxb1 Black has to give up the queen.

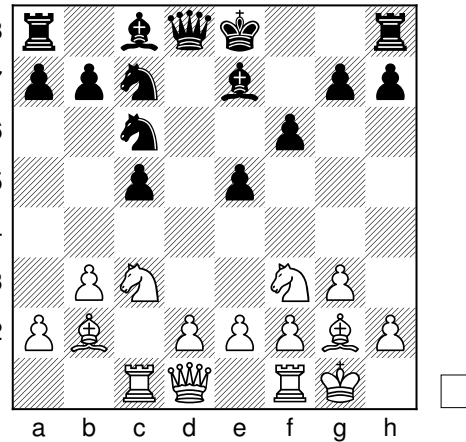

[\[Analyse on Lichess\]](#)

Selected puzzles:

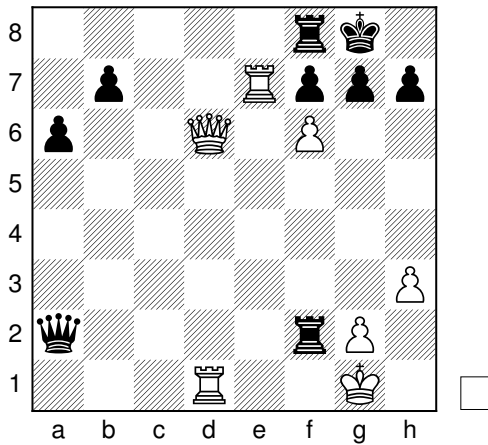

[\[Analyse on Lichess\]](#)

Closest FENs - [\[1\]](#), [\[2\]](#), [\[3\]](#)

1. Re3! The only winning withdrawing move. Rxg2+ 2. Kh1 gxf6 If 2... h6 3. Qxf8+! 3. Rg3+ Rxg3 4. Qxg3+ Kh8 5. Qd6! Black cannot defend the hanging rook and pawn on f6.

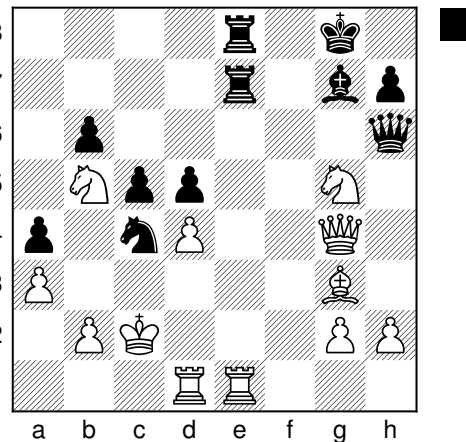

[\[Analyse on Lichess\]](#)

Closest FENs - [\[1\]](#), [\[2\]](#), [\[3\]](#)

1... Qg6+ 2. Kc1 Na5! Black places the knight on the rim, threatening checkmate. 3. b3 axb3 White surprisingly has no good way to defend the threat of Qc2.

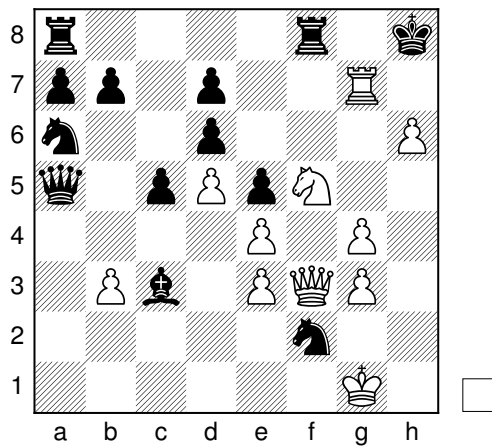

[\[Analyse on Lichess\]](#)

Closest FENs - [\[1\]](#), [\[2\]](#), [\[3\]](#)

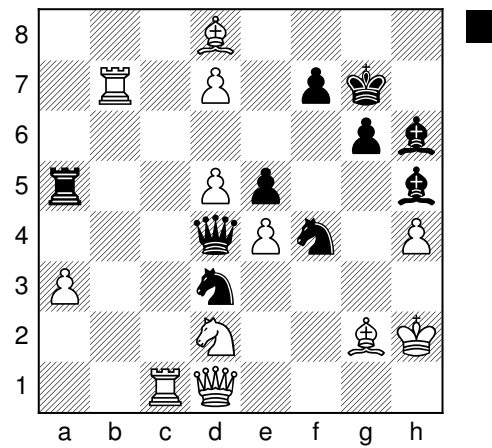

[\[Analyse on Lichess\]](#)

Closest FENs - [\[1\]](#), [\[2\]](#), [\[3\]](#)

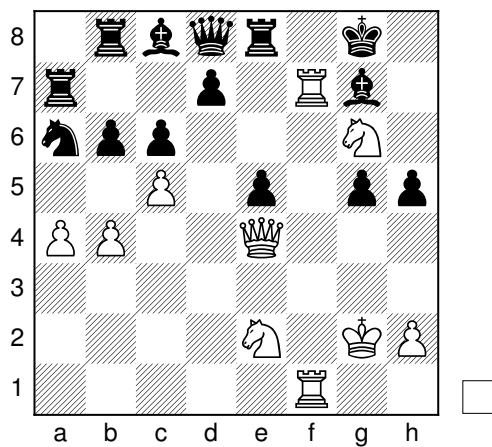

[\[Analyse on Lichess\]](#)

Closest FENs - [\[1\]](#), [\[2\]](#), [\[3\]](#)

#### A.5 Sacrifice Pieces to Stalemate ([Avni, 1991](#))

Book example:

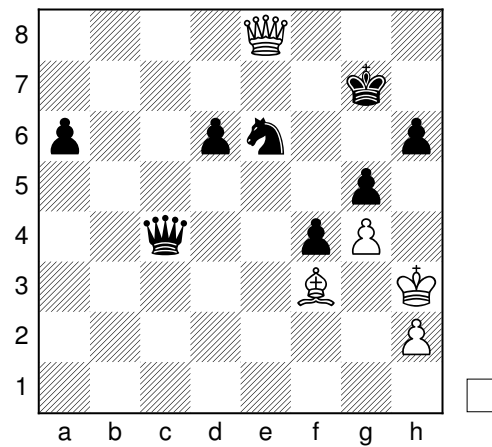

[\[Analyse on Lichess\]](#)

## Selected puzzles:

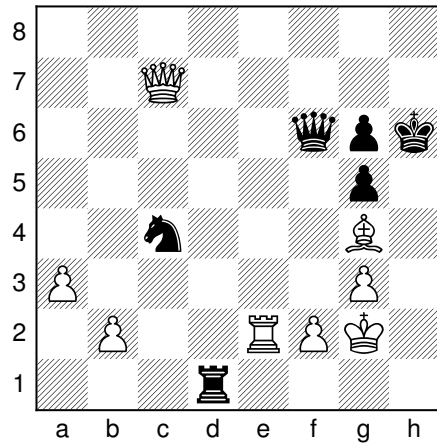

[\[Analyse on Lichess\]](#)

Closest FENs - [\[1\]](#), [\[2\]](#), [\[3\]](#)

1... Ne3+! 2. Rxe3 White is forced to accept the sacrifice due to the bishop hanging on g4. Rg1+! A second sacrifice! 3. Kxg1 (3. Kh3 Qxf2 and White is forced to give up the rook with Qb7 to stop mate.) Qxf2+ 4. Kh1 Qg1+ 5. Kxg1 Stalemate.

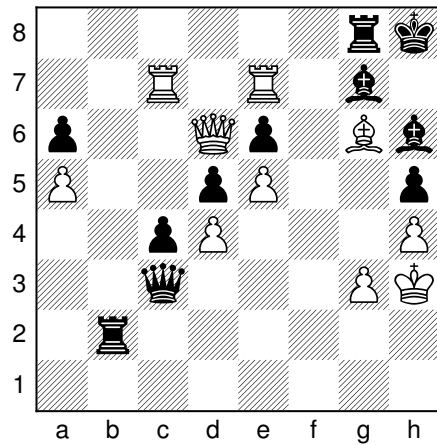

[\[Analyse on Lichess\]](#)

Closest FENs - [\[1\]](#), [\[2\]](#), [\[3\]](#)

1. Rxg7! White starts a chain of sacrifices that surprisingly force a draw. Bxg7 (1... Rxg7?? 2. Qf8+! Rg8 3. Qxh6#) 2. Rxg7! Kxg7 3. Qe7+ Kxg6 4. Qh7+ Kxh7 Stalemate.

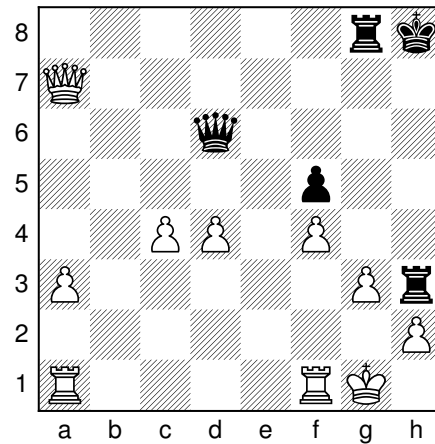

[\[Analyse on Lichess\]](#)

Closest FENs - [\[1\]](#), [\[2\]](#), [\[3\]](#)

1... Rxh2! 2. Kxh2 Qh6+ 3. Kg2 Qh4! Black sets up strong mate threats that White has to address. 4. Rf3 (4. Rh1?? Rxg3 5. Kf2 Rh3+ and Black wins.) Rxg3+! 5. Rxg3 Black has managed to set up the stalemate with the help of White's rook. Qh2+! 6. Kf3 Qe2+ 7. Kxe2 Stalemate.

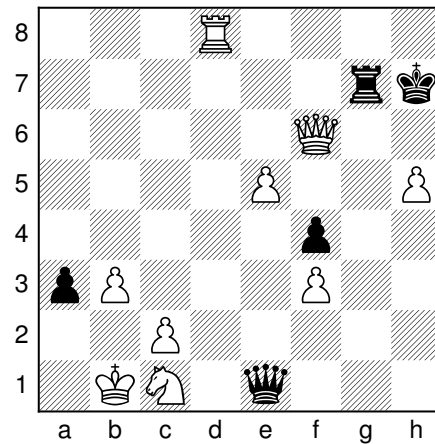

[\[Analyse on Lichess\]](#)

Closest FENs - [\[1\]](#), [\[2\]](#), [\[3\]](#)

Selected puzzles:

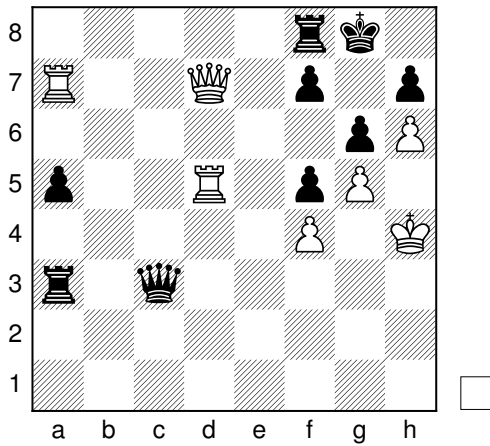

[\[Analyse on Lichess\]](#)

Closest FENs - [\[1\]](#), [\[2\]](#), [\[3\]](#)

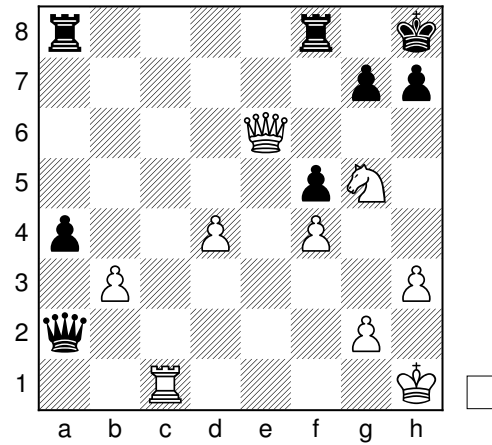

[\[Analyse on Lichess\]](#)

Closest FENs - [\[1\]](#), [\[2\]](#), [\[3\]](#)

A.6 Novotny ([Levitt and Friedgood, 1995](#))

Book example:

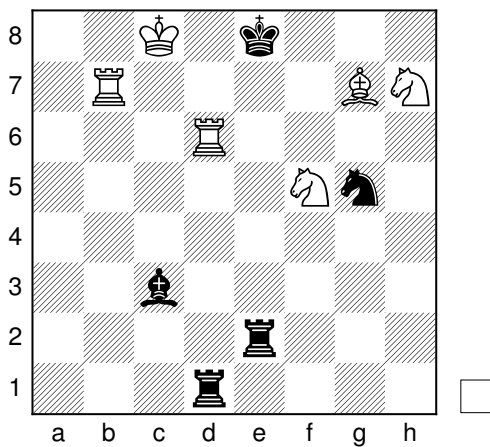

[\[Analyse on Lichess\]](#)

1. Rc8! White sacrifices the rook two ways! Qxb3 (1... Raxc8 Nf7+ and similarly 1... Rfxc8 Nf7+) 2. Nf7+ d5! Blocking the queen trade. 3. Qd1+ Kh2 4. Qh5 Nd8+! 5. Kh8 Rxa8 White is up a rook and quickly ending the game.

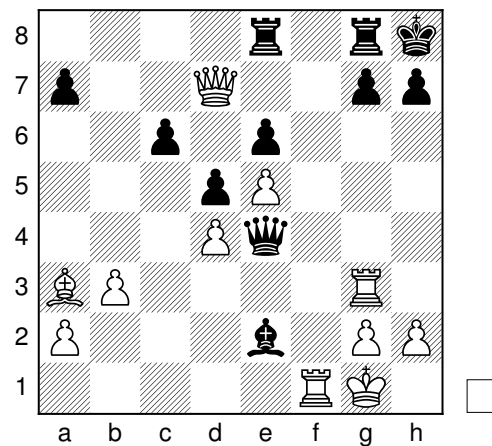

[\[Analyse on Lichess\]](#)

Closest FENs - [\[1\]](#), [\[2\]](#), [\[3\]](#)

1. Bf8! White sacrifices the bishop two ways! g6 (1... Rxf8 2. Qxg7+! Rxg7 3. Rxf8+ Rg8 Rfxg8#) 2. Qxe8 Bxf1 3. Qf7! Qf5 4. Rf3! Qxf7 5. Rxf7 Black ends the combination with a dominating position.



## A.7 Interference (Levitt and Friedgood, 1995)

Book example:

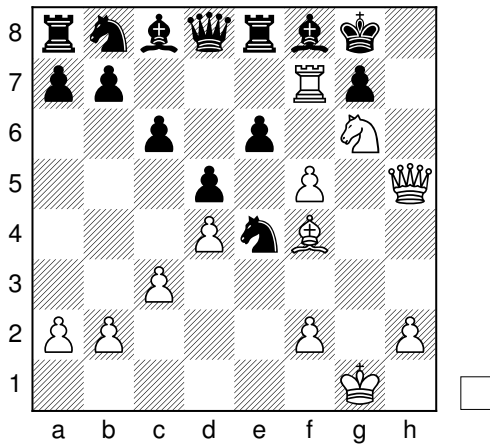

[\[Analyse on Lichess\]](#)

Closest FENs - [\[1\]](#), [\[2\]](#), [\[3\]](#)

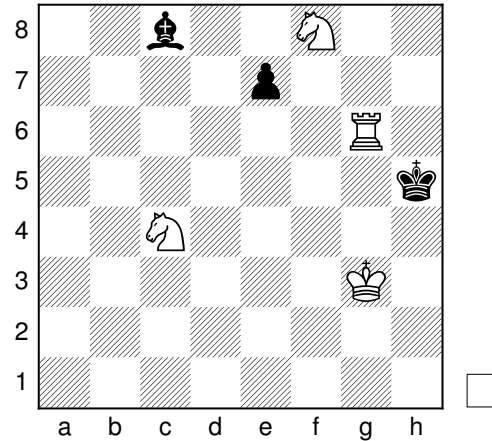

[\[Analyse on Lichess\]](#)

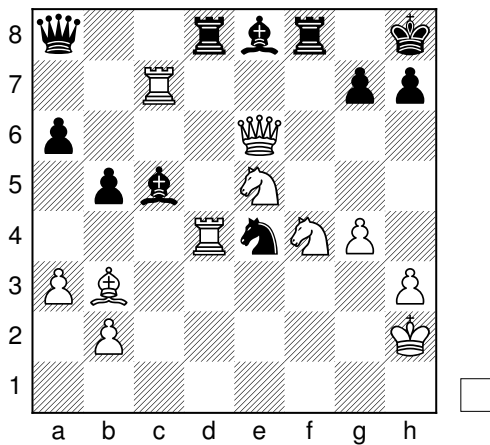

[\[Analyse on Lichess\]](#)

Closest FENs - [\[1\]](#), [\[2\]](#), [\[3\]](#)

Selected puzzles:

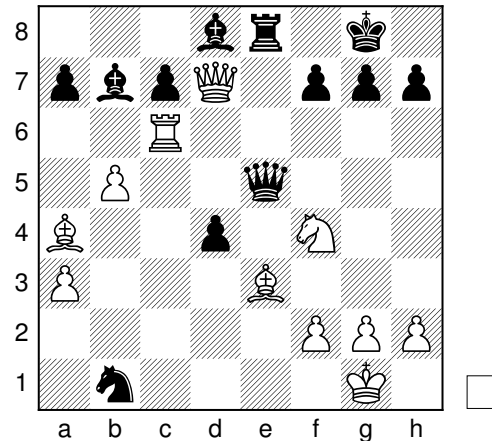

[\[Analyse on Lichess\]](#)

Closest FENs - [\[1\]](#), [\[2\]](#), [\[3\]](#)

1. Re6! White interferes with the coordination of Black's queen and rook. Rxe6 2. Nxe6 Black cannot recapture due to back-rank issues. h6 3. Qxd8+ Kh7 4. Nf8+ Kg8 5. Ng6+ Kh7 6. Nxe5 White ends the combination with overwhelming material.

## Selected puzzles:

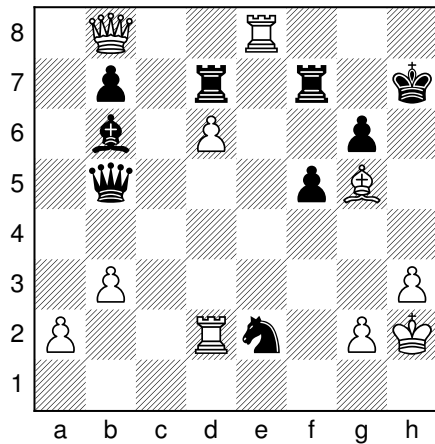

[\[Analyse on Lichess\]](#)

Closest FENs - [\[1\]](#), [\[2\]](#), [\[3\]](#)

1... Rd8! Black sacrifices the rook to interfere with White's pieces. 2. Bxd8 If instead 2. Rxd8 Qe5+ is mating quickly and if 2. Qxd8 simply Bxd8 Qxe8 3. Rxe2 Qxd8 Black remains up a piece and should win comfortably with correct play.

A.8 Unprotected Position ([Avni, 1991](#))

Book example:

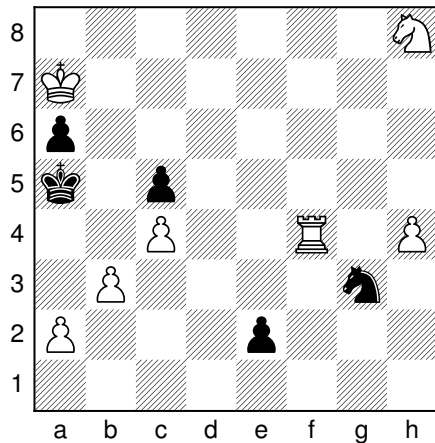

[\[Analyse on Lichess\]](#)

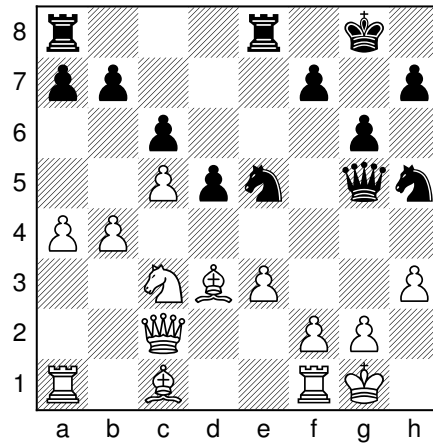

[\[Analyse on Lichess\]](#)

Closest FENs - [\[1\]](#), [\[2\]](#), [\[3\]](#)

1... Nf3+ 2. Kh1 Qg3! 3. gxf3 Qxh3+ 4. Kg1 Re5 Ending the game with a rook lift. 5. f4 Nxf4! 6. exf4 Qg4+ 7. Kh1 Rh5#.

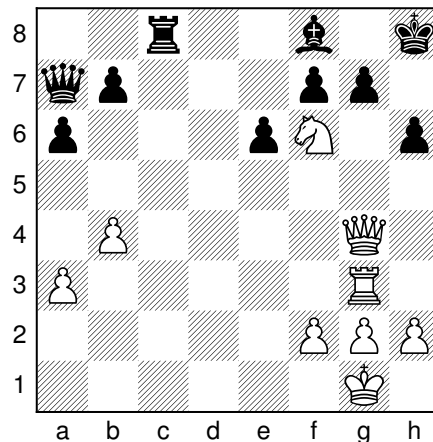

[\[Analyse on Lichess\]](#)

Closest FENs - [\[1\]](#), [\[2\]](#), [\[3\]](#)

1. Qg5! Defending c1 and threatening 2. Qxg6+ gxh6 3. Rg8#. Black tries to hold the position. g6 2. Rh3 Kg7 3. Rxh6 Rc1+ 4. Qxc1 Black is forced to give up material to defend check-mate.

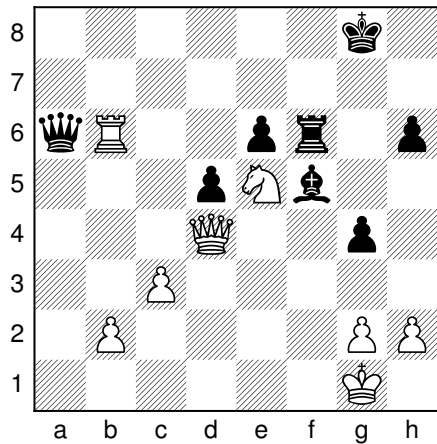

[\[Analyse on Lichess\]](#)

Closest FENs - [\[1\]](#), [\[2\]](#), [\[3\]](#)

1... Bd3! **Black leaves the queen hanging, but the queen cannot be captured due to the mate threat on f1.** 2. Rb8+ If 2. h3 g3! 3. Rb8+ Kg7 4. Qg4+ Bg6 5. Qxg3 Qa7+ and Black picks up the rook. Kg7 3. Qxg4+ Bg6 4. h3 Ba7+ Black picks up the rook.

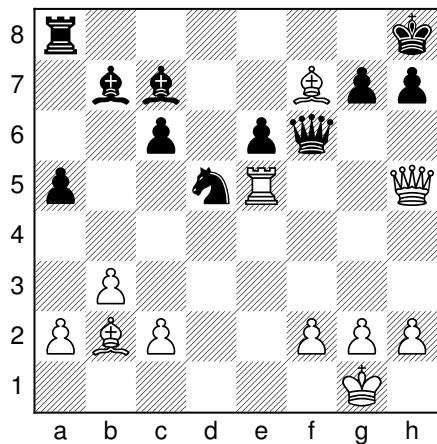

[\[Analyse on Lichess\]](#)

Closest FENs - [\[1\]](#), [\[2\]](#), [\[3\]](#)

1. Rxd5! e5 If Qxb2 2. Qxh7+! Kxh7 3. Rh5# 2. Bxe5 Bxe5 3. Rxe5 g6 4. Qg5! **The critical move that makes this variation work.** Qxf7 5. Re7 Qf8 6. Qe5+ Kg8 7. Rxb7 Re8 White seems in trouble due to the back-rank issues, but there is a beautiful finishing move here. 8. Rg7+! Qxg7 9. Qe8+ Qf8 10. Qxf8 After the dust has settled, white remains up 2 pawns and easily wins the pawn endgame.

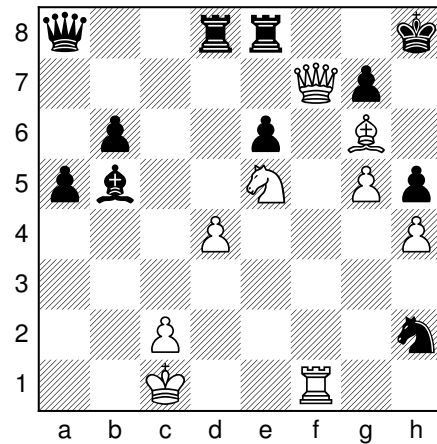

[\[Analyse on Lichess\]](#)

Closest FENs - [\[1\]](#), [\[2\]](#), [\[3\]](#)

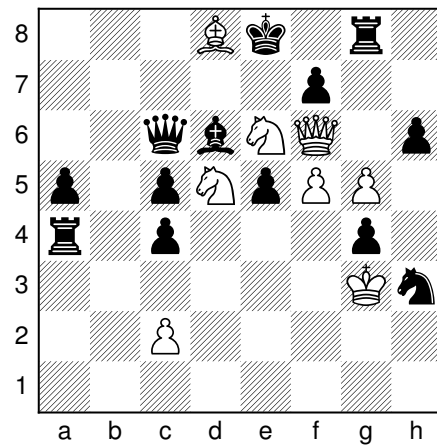

[\[Analyse on Lichess\]](#)

Closest FENs - [\[1\]](#), [\[2\]](#), [\[3\]](#)

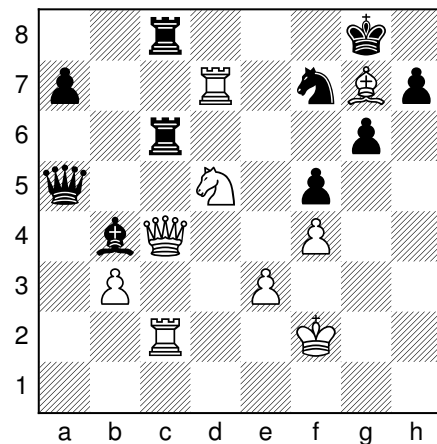

[\[Analyse on Lichess\]](#)

Closest FENs - [\[1\]](#), [\[2\]](#), [\[3\]](#)

## A.9 XRay Attack

Selected puzzles:

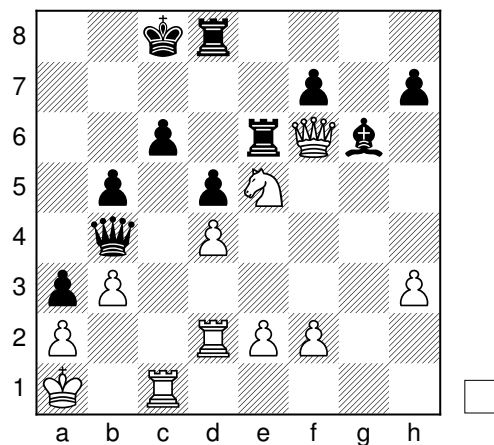

[\[Analyse on Lichess\]](#)

Closest FENs - [\[1\]](#), [\[2\]](#), [\[3\]](#)

1. Rc6+ The queen defends the rook via an x-ray. Rxc6 The immediate Kb7 transposes to the main line. 2. Qxd8+! Kb7 3. Qb8+ White insists on the sacrifice. Black is now forced to accept. Kxb8 4. Nxc6+ Winning the queen in the next move. White finishes the variation up a rook.

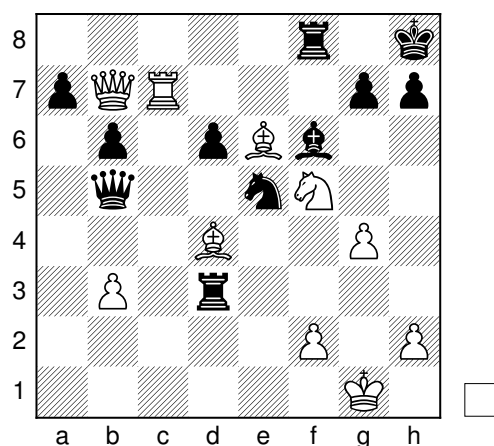

[\[Analyse on Lichess\]](#)

Closest FENs - [\[1\]](#), [\[2\]](#), [\[3\]](#)

1. Bc4 Nf3+ If Rd1+ instead, then 2. Kg2 Qb4 3. Rxg7! and White wins quickly. 2. Kg2

Nh4 3. Nxh4 Qg5 Black attempts a clever maneuver, rerouting the queen towards a better attacking square hoping to complicate matters. 4. Rxg7! Qxg7 5. Qxg7 Bxg7 8. Bxg7 The x-ray attack of White's bishop results in massive liquidation. Kxg7 9. Bxd3 White ends the combination with a bishop and knight for a rook, in a technically winning endgame although it will require careful play.

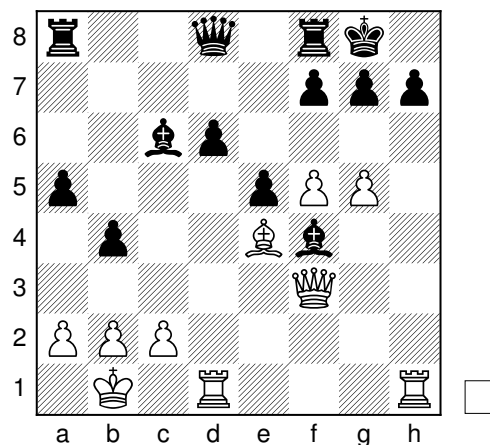

[\[Analyse on Lichess\]](#)

Closest FENs - [\[1\]](#), [\[2\]](#), [\[3\]](#)

## A.10 Paralysis ([Levitt and Friedgood, 1995](#))

Book example:

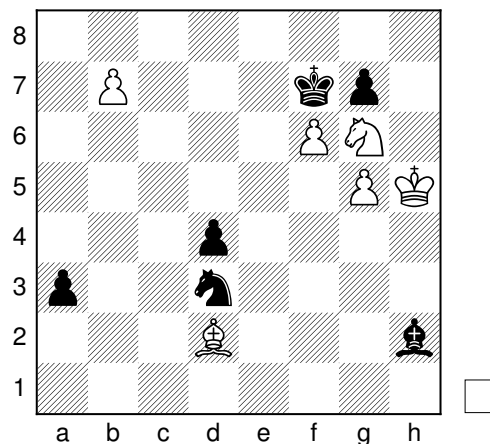

[\[Analyse on Lichess\]](#)

## Selected puzzles:

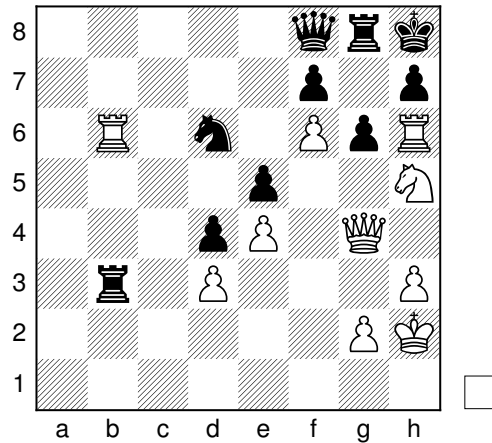

[\[Analyse on Lichess\]](#)

Closest FENs - [\[1\]](#), [\[2\]](#), [\[3\]](#)

1. Ng7 White sets up 2. Rxh7+ 3. Qh4#. Black is forced to act quickly. Rxg7 2. Rxb3! White ignores the situation on the king side and instead aims to suffocate Black's pieces. Ne8 3. Qh4 Black's position is completely paralysed. We show a line that highlights the theme. Qc5 4. Rb8! Qc6 5. Qg5! Black is never able to save the rook due to mate threats with Rxh7+. Kg8 6. Qxe5! Kh8 7. Rxe8+ Rg8 8. Rxg8+ Kxg8 9. Qb8+ Qe8 10. Qxe8#.

be able to eventually win this position without much resistance.

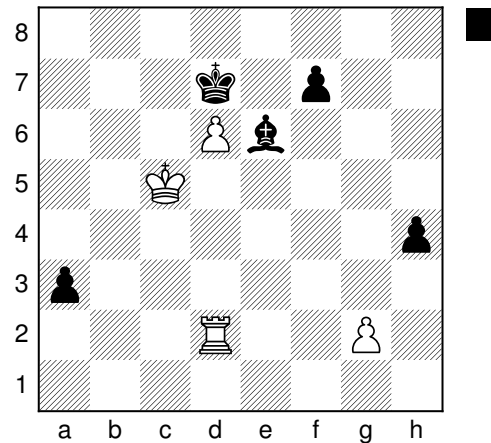

[\[Analyse on Lichess\]](#)

Closest FENs - [\[1\]](#), [\[2\]](#), [\[3\]](#)

1... a2 2. Rd1 Bf5 Black threatens Bb1 which would secure the promotion. 3. Rf1 Kd8! Black cannot immediately play Bb1?? due to Rxf7+. The slow Kd8 instead wins! 4. Ra1 Bb1 White is now completely paralysed. Black has the simple plan of pushing the f and h pawns and wins this position without much effort.

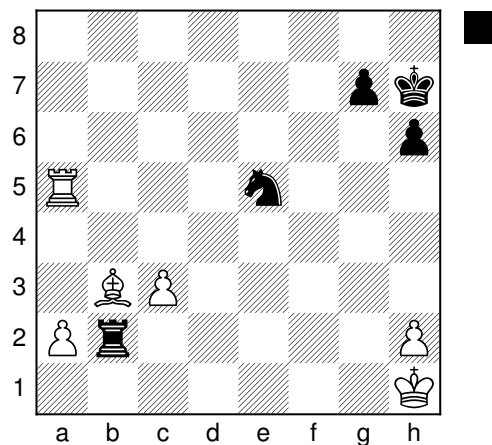

[\[Analyse on Lichess\]](#)

Closest FENs - [\[1\]](#), [\[2\]](#), [\[3\]](#)

1... Nf3 2. Rh5 g5! Black aims to trap the White rook. 3. Bd5 Nh4! If 3. Rh3 g4! 4. Rh5 Kg6 and White loses the rook and is getting mated quickly. 4. Be4+ Kg7 5. Kg1 Rxa2 White's rook is paralysed and Black should

# A.11 Bristol (Levitt and Friedgood, 1995)

Book example:

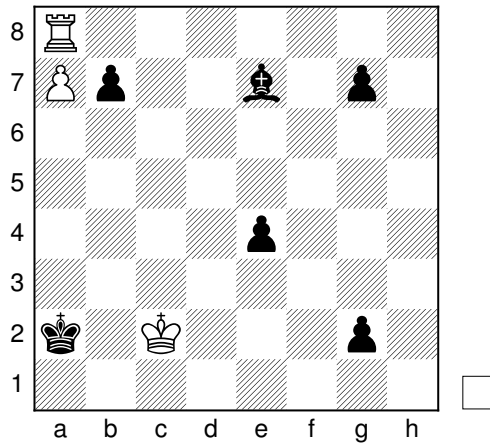

[\[Analyse on Lichess\]](#)

Selected puzzles:

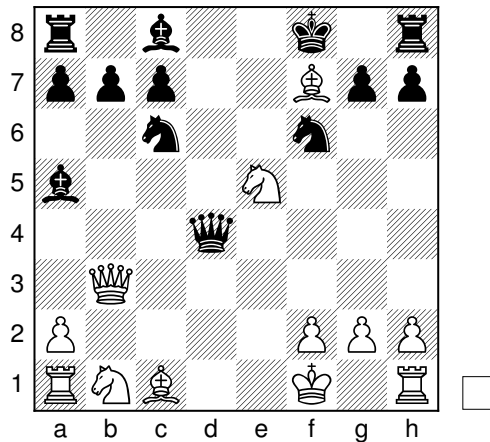

[\[Analyse on Lichess\]](#)

Closest FENs - [1], [2], [3]

1. Ba3+ Nb4 1... Ne7 is again met by 2. Bg8 and 1... Bb4 is followed by simply 2. Nxc6. 2. Bg8! The Bristol move, making space for the White queen. Be7 3. Bb2 White does not hurry with Bf7+ and first plays an intermezzo to solidify their position. Qc5 4. Qf7+ Kd8 5. Nc3 White enjoys a decisive advantage with a safer king and very active pieces.

# A.12 King on Tour (Persson, 2024)

Book example:

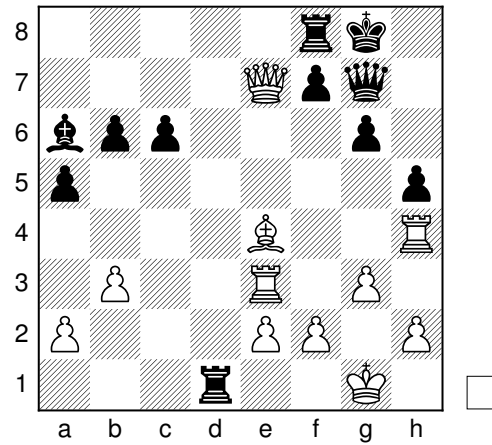

[\[Analyse on Lichess\]](#)

Selected puzzles:

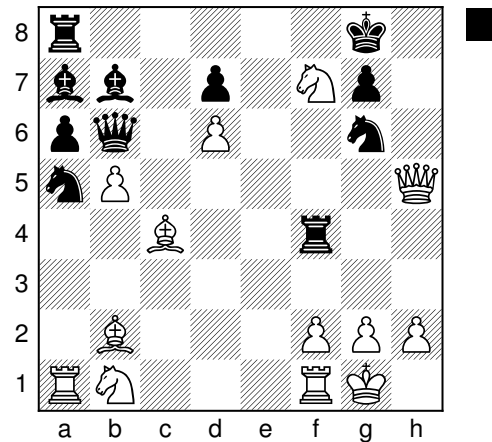

[\[Analyse on Lichess\]](#)

Closest FENs - [1], [2], [3]

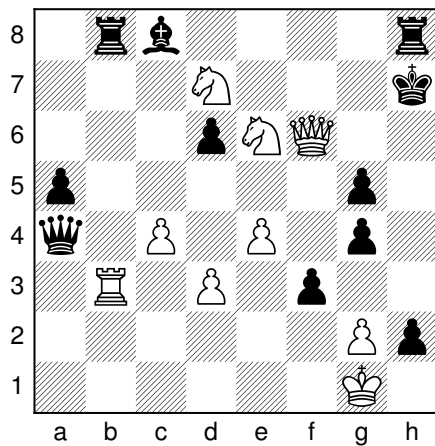

[\[Analyse on Lichess\]](#)

Closest FENs - [\[1\]](#), [\[2\]](#), [\[3\]](#)

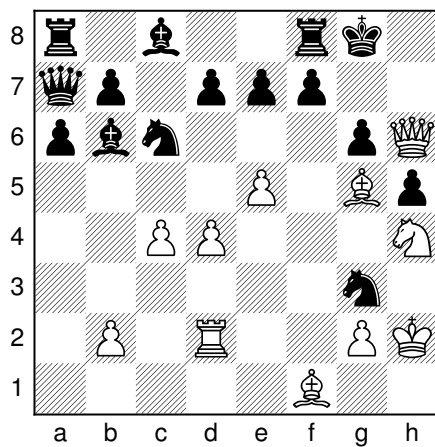

[\[Analyse on Lichess\]](#)

Closest FENs - [\[1\]](#), [\[2\]](#), [\[3\]](#)

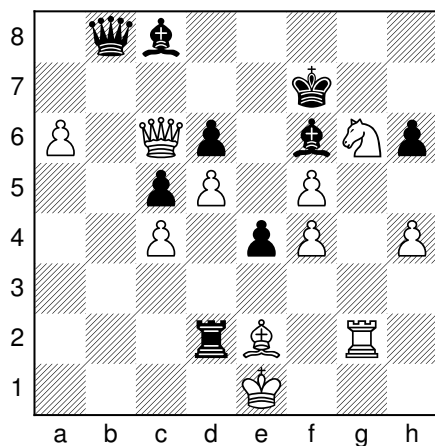

[\[Analyse on Lichess\]](#)

Closest FENs - [\[1\]](#), [\[2\]](#), [\[3\]](#)

### A.13 Switchback ([Levitt and Friedgood, 1995](#))

Book example:

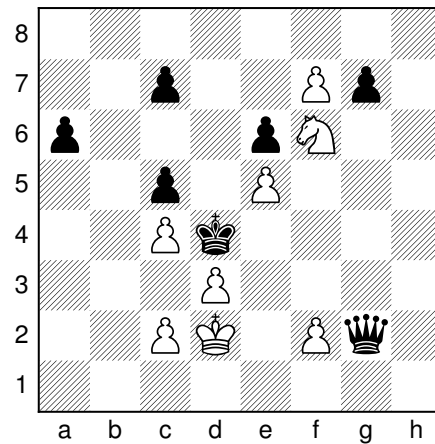

[\[Analyse on Lichess\]](#)

Selected puzzles:

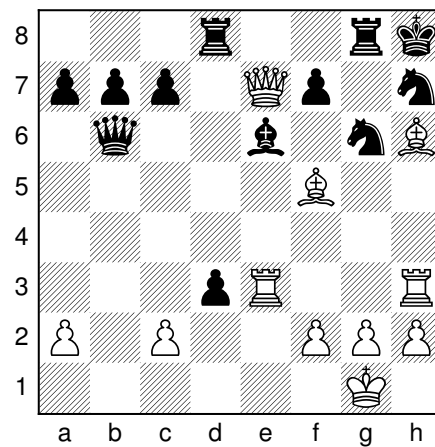

[\[Analyse on Lichess\]](#)

Closest FENs - [\[1\]](#), [\[2\]](#), [\[3\]](#)



## A.14 Uncategorized

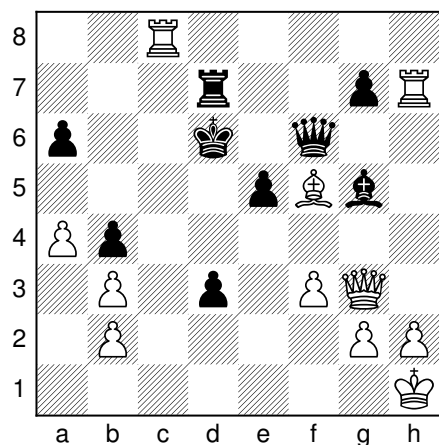

[\[Analyse on Lichess\]](#)

Closest FENs - [\[1\]](#), [\[2\]](#), [\[3\]](#)

1... d2 2. Bc2 Qf5! The only winning idea. Black sacrifices the queen to try to promote the pawn. 3. Bd1 Qc1 White's pieces are not coordinated and there is no good response.

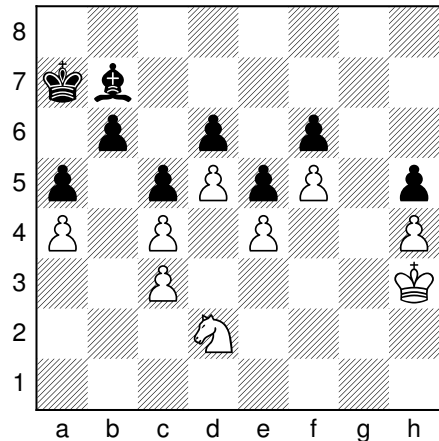

[\[Analyse on Lichess\]](#)

Closest FENs - [\[1\]](#), [\[2\]](#), [\[3\]](#)

## B Puzzles generated with evolutionary search

The following puzzles are selected from the ones generated with evolutionary search.

As briefly discussed in the Introduction, this method contrasts sharply with our generative modeling approaches. Instead of learning from

data, this method relies on applying random mutations and perturbations to a population of chess positions, and directly optimizes for counter intuitiveness check. The optimization process does not enforce realism constraints, which is a feature of our generative approaches and so the puzzles produced with this method often diverges significantly from expert-level games. The allows for generating beyond what is present within the training data, demonstrating a powerful alternative for creative chess puzzle generation.

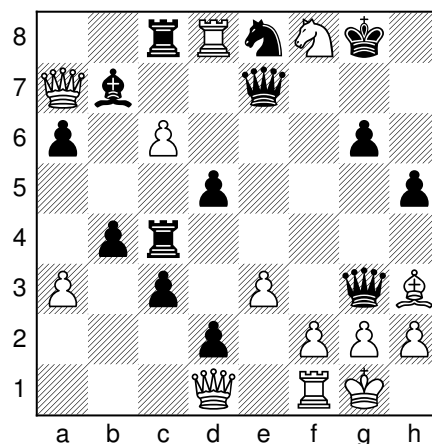

[\[Analyse on Lichess\]](#)

1... Qxh3 Giving up the queen for the bishop is the right decision here. The other moves fail tactically. For example 1...Qc7 2. Rd7 or 1... Qb8 2. Qxb8 or 1... Qg5 2. cxb7 Rxd8 3. Ne6 Qf6 4. Nxd8 Rc7 5. Qa8 is winning for White 2. gxh3 Rxc6 3. Rxc8 Qg5+ 4. Kh1 Bxc8 5. Qf3 Qf5 6. Qxf5 Bxf5 7. Qd4 Kxf8 8. Qxb4 Nd6 And the pawns on the queenside can't be stopped.

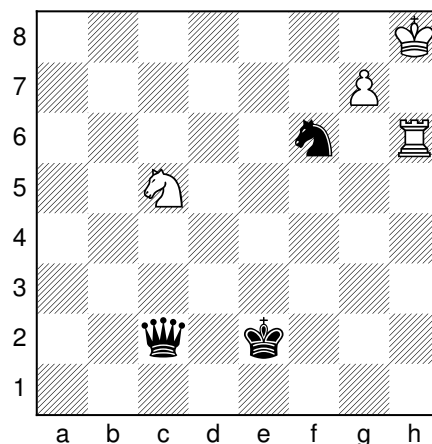

[Analyse on Lichess]

1... Qc4! Not 1... Qxc5 2. Rxf6 Qh5+ 3. Kg8 and while Black can hold the draw, there is no path to a win here. Other tries don't work either, for example 1... Qf5 2. Nd7! Qxd7 3. Rxf6 Qh3+ 4. Kg8 Qc8+ 5. Rf8 and this is a draw. Another try would be 1... Qc3, but then White can just play Ne6 and a draw would ensure shortly. 2. Rxf6 Qh4+ 3. Kg8 Qxf6 4. Nd7 Qf5 5. Nf8 Ke3 and Black can start bringing the king forward. If White tries 6. Kh8 Qe5 7. Kg8 Qh5 8. Ne6 Ke4 and the king keeps approaching.

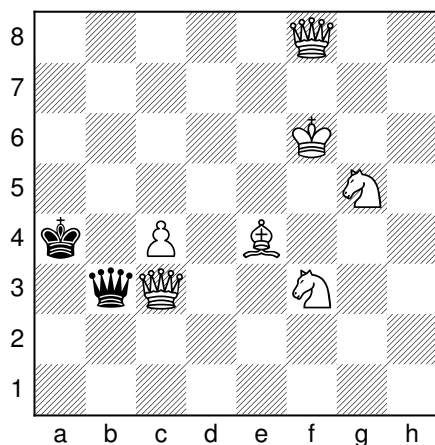

[Analyse on Lichess]

Despite White's overwhelming material advantage, Black manages to salvage a draw. 1... Qb6+ 2. Ke5 Qf6+ 3. Kd5 Qd6+ 4. Kxd6.

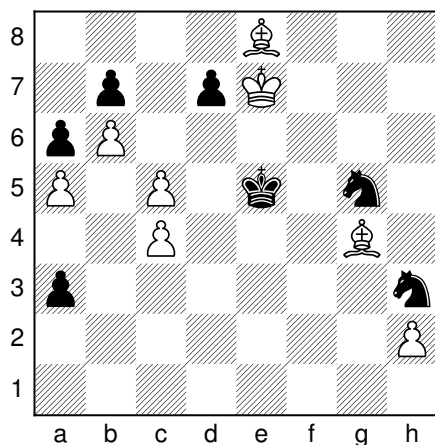

[Analyse on Lichess]

Among the 3 possible captures on d7 (and other alternatives) only one is correct. 1.

Bgxd7 a2 2. c6 a1=Q 3. cxb7 Qa3+ 4. Kd8 Ne6+ 5. Kc8 Qc5+ 6. Bc6 Qe7 7. b8=Q+ wins for White - as an example line that follows. If White were to instead play 1. Kxd7, then Black would lose if following up with 1... a2, but wins in case of 1. Kxd7 Ne4 2. c6 Nc5+ 3. Kc7 bxc6 4. Kxc6 Kd4 5. Bxh3 a2 6. b7 Nxb7 7. Kxb7 a1=Q. It's important to note the following variation: 1. Bgxd7 Ne4 2... c6 Nd6 3. c5, which is why Ne4 can't save Black in the solution. Finally, in case of the other bishop capture: 1. Bexd7 a2 2. c6 a1=Q and now 3. cxb7 wouldn't work (in contrast to the solution) 3... Qa3+ 4. Kd8 Nf7+ 5. Kc7 Qd6+ as an example line - the knight check on f7 is possible as the bishop is no longer on e8 - other moves don't work either (c7 or alternative king moves).

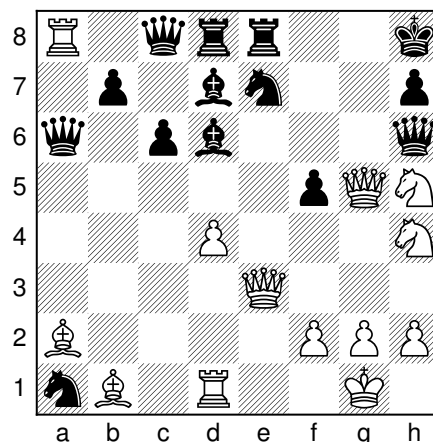

[Analyse on Lichess]

1... Qe2! Moving the queen from one square where it can be captured to another. 2. Qxe2 Qxg5 3. Rxc8 Qxh4 4. g3 Nxc8 and Black is winning.

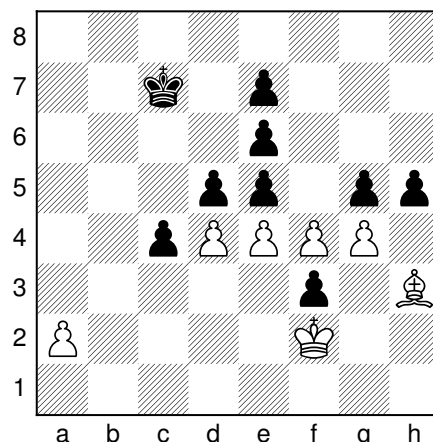

[\[Analyse on Lichess\]](#)

In this position, there are many moves to consider, and precise calculation is needed to establish that only one of them wins for White. 1. Kxf3 hxg4+ 2. Bxg4 dxe4+ 3. Kxe4 c3 4. Kd3 exf4 5. Bxe6 Let's consider the alternatives. 1. dxe5 dxe4 2. fxg5 c3 3. Ke3 f2 4. Bf1 h4 5. g6 c2 6. Kd2 h3 7. Bxh3 e3+ 8. Kxc2 e2 9. g7 e1=Q 10. g8=Q Qxe5 is a draw instead. 1. gxh5 c3 2. h6 c2 3. h7 c1=Q 4. h8=Q Qd2+ 5. Kxf3 dxe4+ is winning for Black, because 6. Kxe4 is impossible due to the threat of 6... Qe2# For the same reason 1. fxg5 fails. Finally, 1. exd5 c3 2. Ke3 exf4+ 3. Kd3 hxg4 4. Bxg4 f2 5. Be2 g4 is winning for Black.

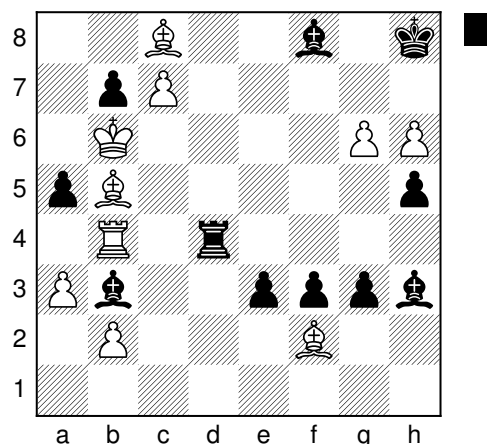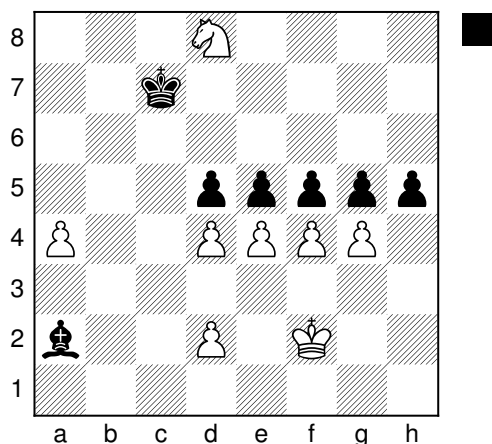

[\[Analyse on Lichess\]](#)

In what is a very messy position, there is a narrow path to a win. 1... Rd6+ (1... axb4 2. Bxh3 Rd6+ 3. Ka7 Bxh6 4. c8=Q+ Bg8 5. Bxg3 Rxc6 6. Be5+ would be winning for White instead. The other captures on move 1 fail as well.) 2. Ka7 (2. Kxb7 Bd5+ 3. Ka7 Bxc8) Bxc8 3. Bxg3 Rxc6 4. Be5+ Kh7 5. Rxb3 Bc5+ 6. Kb8 Rg8 7. Rd3 Bb6 8. Rd8 Rxd8 9. cxd8=Q Bxd8 10. Kxc8 Kxh6 11. Kxd8 Kg5.

[\[Analyse on Lichess\]](#)

Of all the possible pawn captures, only one is winning for Black. 1... fxg4 2. Ne6+ Kd6 3. Nxg5 exf4 4. e5+ Ke7 5. a5 Bc4 and White can't stop the Black pawns. Interestingly, capturing the hanging White knight on the first move would have lost the game for Black. 1... Kxd8 2. gxh5 Ke7 3. exd5 exf4 4. h6 Kf6 5. h7 Kg7 6. d6 Be6 7. a5 Bc8 8. a6.

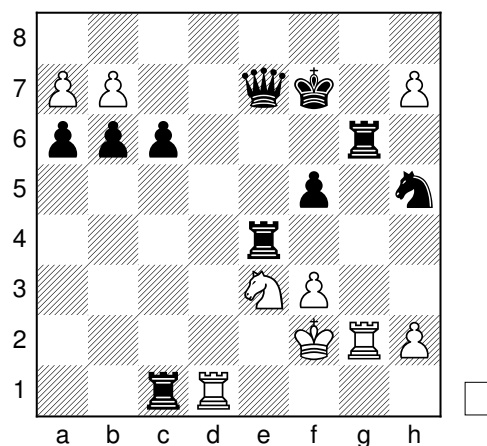

[\[Analyse on Lichess\]](#)

In what is aesthetically a very pleasing position, there are three different pawns that can be promoted on the next move, and multiple additional promising captures to calculate as well - for example, the hanging Black rook on c1. However, it turns out that there is only one winning move, and it is an under-promotion! 1. h8=N+ Kg7 2. Rxg6+ Kh7 3. b8=Q Rc2+ 4. Kf1.

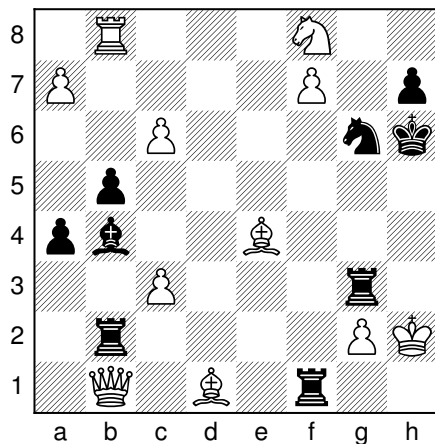

[Analyse on Lichess]

Despite the White queen hanging on b1, Black needs to find a different motif to win in this position. 1... Bd6 2. Qxb2 Rgf3+ 3. g3 Bxg3+ 4. Kh3 Rh1+ 5. Kg2 Nh4+ 6. Kxh1 Rf1#.

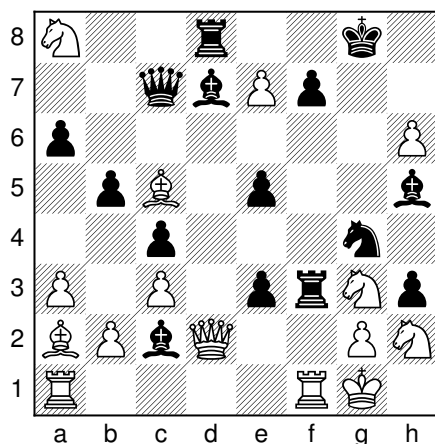

[Analyse on Lichess]

In this astoundingly chaotic and complicated position with many possible captures, there is only one move that secures the win. Perhaps more interestingly, interjecting a check on f1 would throw away the advantage, which is rarely the case! This is especially puzzling at the first glance since the rook is otherwise hanging on f3. Yet, there are specific tactical reasons for why this resource is not available. The correct capture is the capture on a8, one example line being: 1... Rxa8 2. Qd5 Rxc3 3. Nxc4 Bc6 4. Nf6+ Kh8 5. Nxc5 Bxd5 6. Nxc3 Qxc5 where Black is winning. Obviously this line is not forced, but the alternatives don't affect the outcome. So, let's look at why Rxf1

fails specifically on the first move of the problem: 1... Rxf1+ 2. Rxf1 Rxa8 3. Bxe3 Nxe3 4. Qxe3 Qc6 5. Qg5+ Bhg6 6. Nh5 would be winning for White. In contrast, with the rook still there, Black is able to generate simultaneous threats against e3 and g2 in the same variation, under the main line of the solutions: 1... Rxa8 2. Bxe3 Rxc3 3. Nxc4 Bdxg4 4. Qxc2 Rxc2+ 5. Qxc2 hxc2.

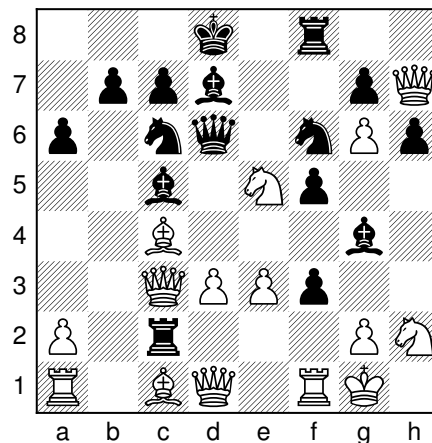

[Analyse on Lichess]

It is possible to capture either of the two White queens on c3 and h7 respectively, but neither is the best move - the best move involves ignoring the opportunity and giving a check instead. 1... Rxc3 2. Nxd7 Qxd7 3. gxf3 Bh5 4. Bb2 Nxc7 5. gxc7 Rxc4 6. dxc4 Rh8 7. Bxc7 Rxc7 8. Qxd7+ Kxd7 9. Bd4 Nxd4 10. Rfd1 Bd6 11. Rxd4 Kc6 12. f4 Bc5 13. Rd3 Be2 14. Rc3 is only a draw - as an example line that may follow from the capture.

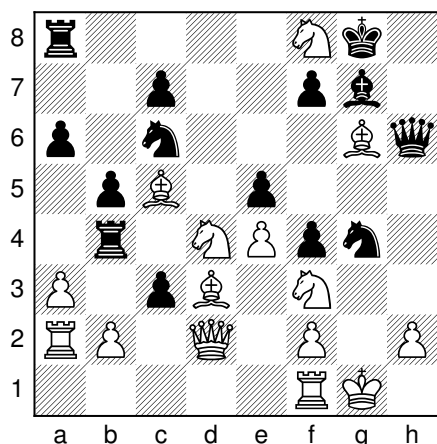

[Analyse on Lichess]

Black needs to find the correct capture, among the available options. 1... Nxd4 2. Bxd4 cxd2 3. axb4 exd4 4. Bf5 Qh3 is winning for Black, unlike the alternatives. If instead: 1... Rxd4 2. bxc3 Rxd3 3. Qxd3 Bxf8 4. Bxf7+ Kxf7 5. Qd5+ Kg7 6. Qd7+ Kh8 7. Qxg4 or 1... cxd2 2. Nf5 Qh3 3. Bxf7+ Kxf7 4. Ng5+ or another example line (with possible deviations at several points): 1... exd4 2. bxc3 fxg6 3. Ne6 Nce5 4. Neg5 dxc3 5. Qd1 Bf6 6. Bxb4 Bxg5 7. h4 Bxh4 8. Bxc3.

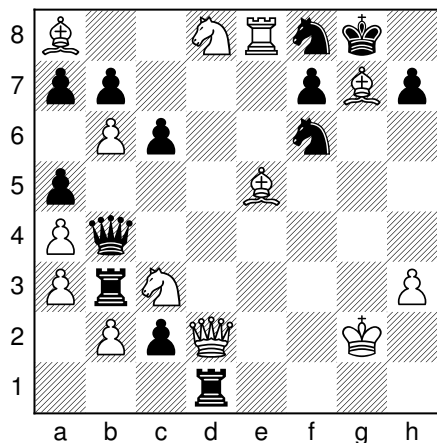

[Analyse on Lichess]

Of several possible first moves, only one wins. One possible continuation would be: 1. Qf2 c1=Q 2. axb4 Qg5+ 3. Bg3 Kxg7 4. Nxd1 Qd5+ 5. Kh2 Nxe8 6. bxa7 Qxd8 7. Bxb7 Nc7 8. Ne3 Kg8 9. Ng4 Rxg3 10. Qxg3 Nfe6 11. Nh6+ Kf8 12. Qg8+ Ke7 13. Qxf7+ Kd6 Moving the queen to e2 instead fails due to: 1. Qe2 Rg1+ 2. Kxg1 c1=Q+ and if 1. Qg5 c1=Q.

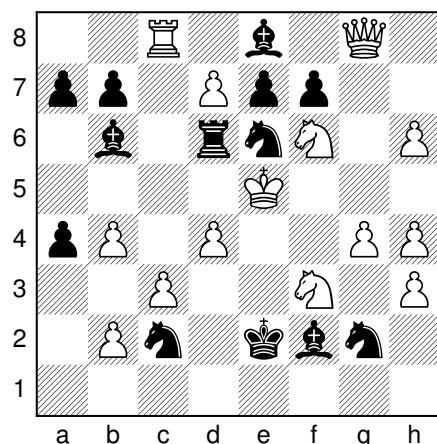

[Analyse on Lichess]

To win, amidst the chaos, White needs to play a quiet king move in the centre of the board. 1. Ke4 Bxd7 2. Nxd7 If instead 1. Qh7 Bg3+ 2. Ke4 Nc5+ 3. Rxc5 Re6+ 4. Re5 Rxf6 5. Ng1+ Kd2 6. Nf3+ Ke2 7. Ng1+ the threats against the White king secure Black a draw.

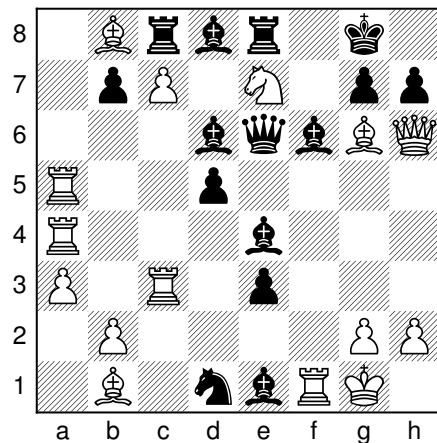

[Analyse on Lichess]

Black has 5 different ways of capturing the knight on e7 that is giving check. However, the only correct decision is not to capture it at all! 1... Kf8 2. Qxh7 Bf2+ 3. Kh1 Kxe7 4. cxd8=Q+ Rxd8 5. Bxd6+ Rxd6 6. Rxc8 e2 7. Re8+ Kd7 8. Bd3 Bxd3 9. Bxd3 exf1=Q+ 10. Bxf1 Qxe8 11. Qd3 Ne3 12. Qb5+ Ke7 13. Qxb7+ Qd7 seems to be holding on, in an example continuation. Alternatively, 1... B8xe7 2. Qxh7+ Kf8 3. Rxe4 dxe4 4. Qh8+ Qg8 5. Qxg8+ Kxg8 6. Ba2+ Kf8 7. Rh5 is winning for White. Rxe4 comes up as a motif in some of the other lines, for alternative first-move captures.

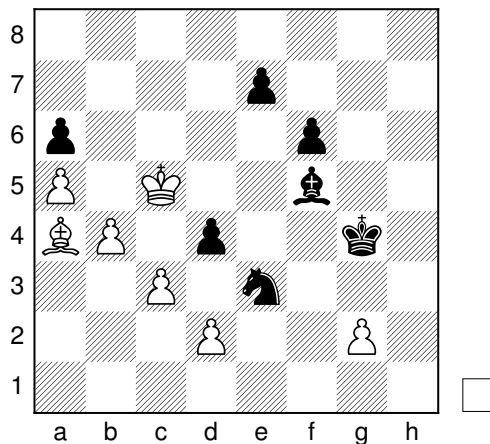

[Analyse on Lichess]

1. cxd4 Nxf2 2. Kb6 Bc8 3. Bc6 Nf4 4. Bb7 Bxb7 5. Kxb7 Nd5 6. b5 Nb4 7. bxa6 Nxa6 8. Kxa6 f5 9. Kb6 f4 10. a6 f3 11. a7 f2 12. a8=Q f1=Q 13. Qg8+ and White will pick up the e7 pawn and have a winning position. Alternative first-move captures don't work for White, for example: 1. Kxd4 Nxf2 2. Kc5 Nf4 3. b5 Nd3+ 4. Kb6 Nb2 5. Bb3 axb5 6. a6 Nc4+ 7. Kxb5 Nd6+ 8. Kc5 Nc8 9. Bd5 Bd3 10. Bb7 Bxa6 11. Bxa6 Nd6 is a draw, and capturing the knight instead loses: 1. dxe3 dxc3 2. Kb6 Bd3.

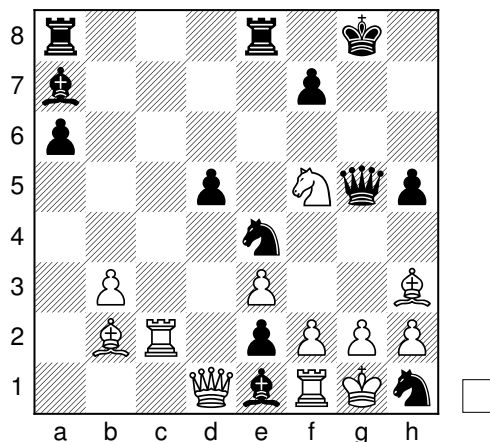

[Analyse on Lichess]

1. Rxe2 Nxf2 2. Qxe1 Nd3 3. Qd1 Nxb2 4. Rxb2 Bxe3+ 5. Nxe3 Nc3 6. Qf3 Qxe3+ 7. Rbf2 Ra7 8. Qxe3 Rxe3 9. Rf5 With equality. This is ultimately a choice between two possible captures on e2 - with interesting ideas in both lines. If (the wrong move) 1.Qxe2 then after 1...Nxf2 2. Qxe1 Nxf3+ 3.Kh1, Black plays the beautiful move 3...Nf4! where after 4.Rxf4 Qxf4! (Another nice sacrifice) 5. exf4

Nf2+ 6. Qxf2 Bxf2 Black is suddenly up material. But the reason why Rxe2 works instead is even more subtle. So, let's look at that same line, just with the rook on e2. 1.Rxe2 Nxf2 2. Qxe1 Nxf3+ 3. Kh1 Nf4 4. Rxf4 Qxf4 and now instead of exf4, White has a surprising option 5. Ne7+! Rxe7 6. exf4 Nxf2+ 7. Qxf2 Bxf2 8. Rxe7 - because the rook on e7, where it captured the knight, is not defended by the rook on a8, White doesn't end up down an exchange.

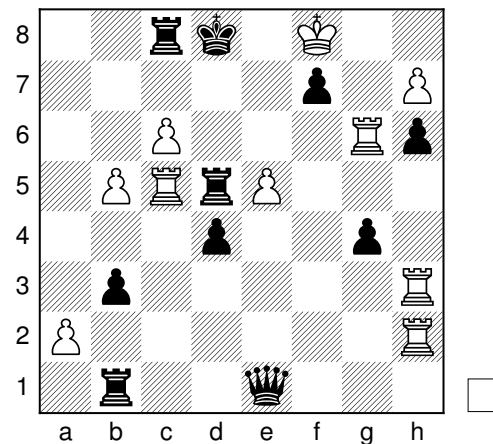

[Analyse on Lichess]

The Black rook on d5 is hanging with check, but capturing it is, surprisingly, not best. 1. b6 Qb4 2. Rd6+ Rxd6 3. h8=Q Qxb6 4. exd6 With mate to follow. If instead 1. Rxd5+ Kc7+ 2. Kxf7 Qf1+ 3. Rf6 Qc4 4. Rd6 gxh3 5. Ke7 Rg1 it would be Black who is winning.

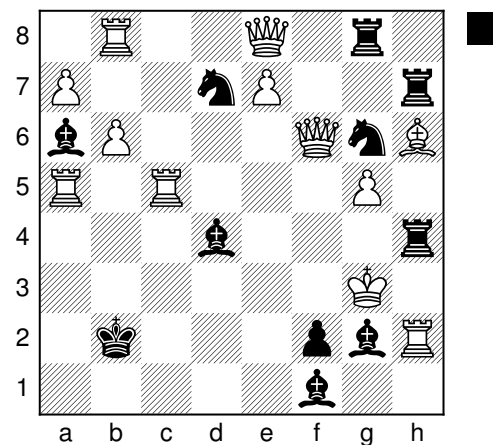

[Analyse on Lichess]

There are many possible moves to consider in this chaotic and highly unrealistic board setup.

Yet, there is only one solution, and it involves a temporary forced rook sacrifice! 1... Rg4+ 2. Kxg4 Nxf6+ And now recapturing doesn't work because 3. gxf6 Bfe2+ 4. Kg5 Nf8+ 5. Bg7 Be3+ 6. Kf5 f1=Q+ 7. Ke5 Qf4# 3. Kg3 Ne4+ 4. Kg4 Bfe2+ 5. Kf5 f1=Q+ 6. Ke6 Nxc5+ 7. Rxc5 Bg4+ 8. Rf5 Qxf5+ 9. Kd6 Qe5#.

## C Puzzles adversarial to chess engines

The following puzzles were generated with reinforcement learning. These positions are computationally demanding, and often requires significant search-time for Stockfish to determine the optimal line. This is likely because of many pieces on the board, which causes Stockfish to evaluate a number of lines from a large search tree.

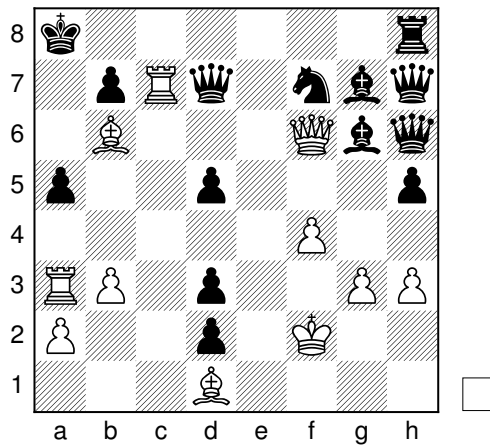

[\[Analyse on Lichess\]](#)

Closest FENs - [\[1\]](#), [\[2\]](#), [\[3\]](#)

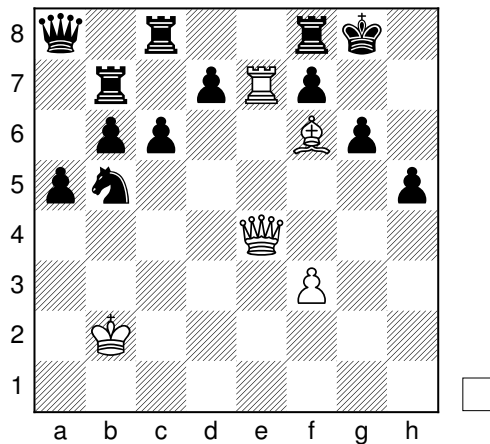

[\[Analyse on Lichess\]](#)

Closest FENs - [\[1\]](#), [\[2\]](#), [\[3\]](#)

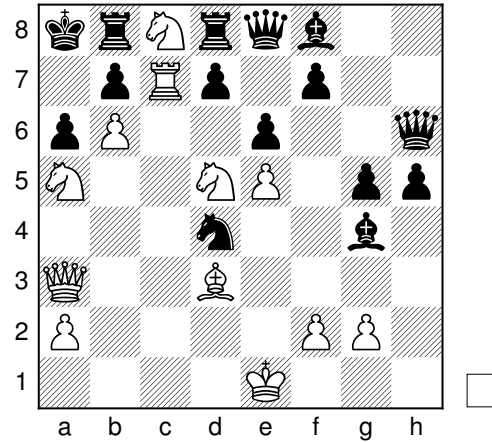

[\[Analyse on Lichess\]](#)

Closest FENs - [\[1\]](#), [\[2\]](#), [\[3\]](#)

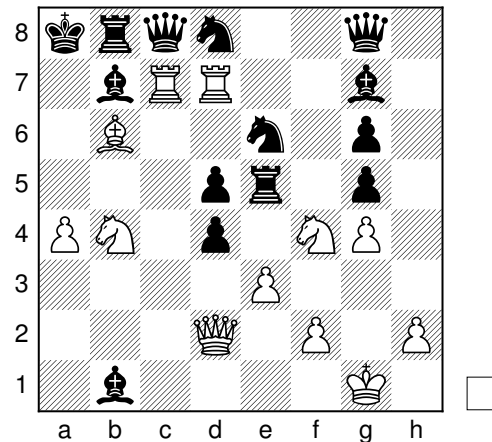

[\[Analyse on Lichess\]](#)

Closest FENs - [\[1\]](#), [\[2\]](#), [\[3\]](#)



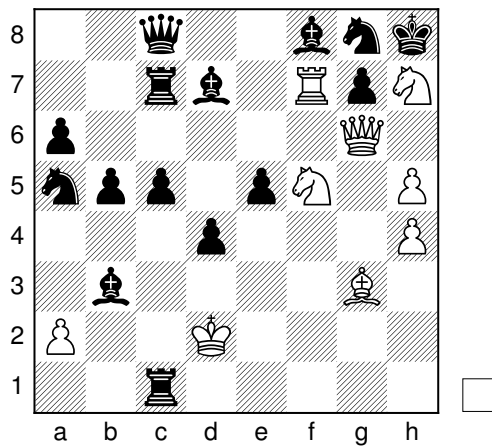

[\[Analyse on Lichess\]](#)

Closest FENs - [\[1\]](#), [\[2\]](#), [\[3\]](#)

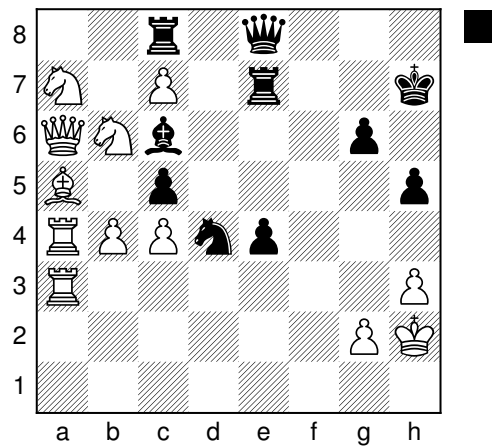

[\[Analyse on Lichess\]](#)

Closest FENs - [\[1\]](#), [\[2\]](#), [\[3\]](#)

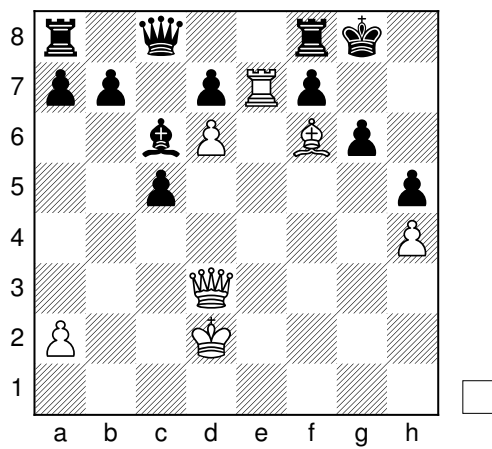

[\[Analyse on Lichess\]](#)

Closest FENs - [\[1\]](#), [\[2\]](#), [\[3\]](#)

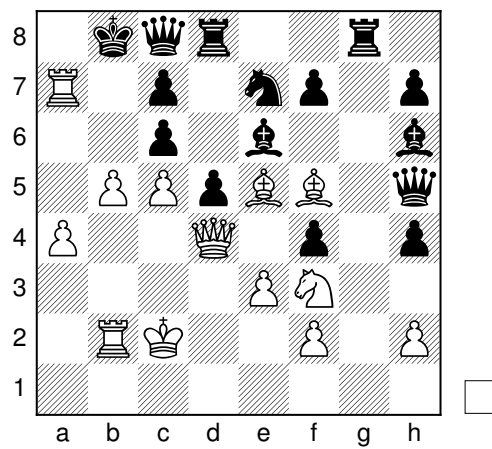

[\[Analyse on Lichess\]](#)

Closest FENs - [\[1\]](#), [\[2\]](#), [\[3\]](#)

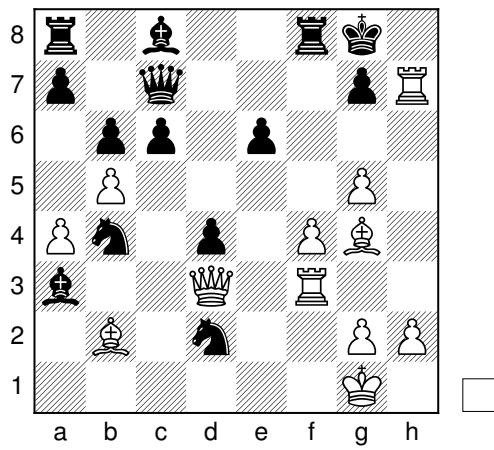

[\[Analyse on Lichess\]](#)

Closest FENs - [\[1\]](#), [\[2\]](#), [\[3\]](#)

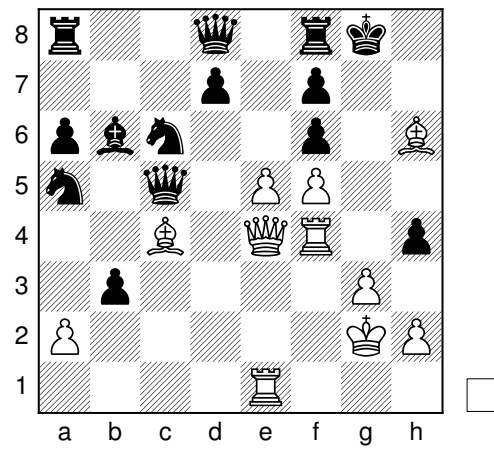

[\[Analyse on Lichess\]](#)

Closest FENs - [\[1\]](#), [\[2\]](#), [\[3\]](#)

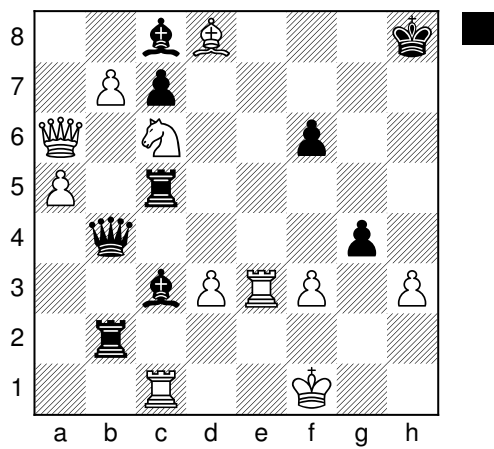

[\[Analyse on Lichess\]](#)

Closest FENs - [\[1\]](#), [\[2\]](#), [\[3\]](#)
